# Supplementary material for: Design of Electrodes on Gold Test Strips for Enhanced Accuracy in Glucose Measurement
Source: Hindawi journal article supplement (doi:10.1155/2019/8627198), 2019-10-15
Supplement: f1 [file 8627198.f1.pdf]

## Supplementary Reference Data

### (1) First reference data

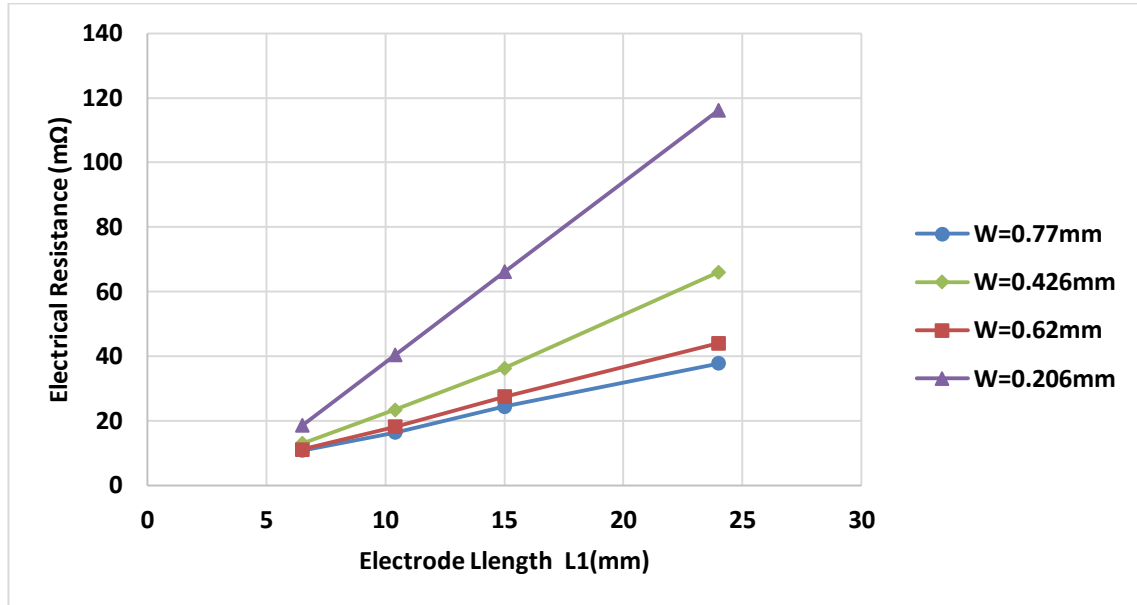

Fig.5 shows the relationship between the average electrical resistance and reference electrode length for 4 different reference electrode widths.

This Fig.5 in the submitted paper was obtained from the following Tables A1 to A4 and Figures B1 to B4.

Table A1 shows the electrical resistance for different reference electrode length of the 24mm, 15mm, 10.4mm, 6.5mm, when the electrode width W is 0.77mm. (Unit: :mΩ)

| Test Strip No. | Electrode length L1= 6.5mm | Electrode length L1= 10.4mm | Electrode length L1= 15mm | Electrode length L1= 24mm |
|----------------|----------------------------|-----------------------------|---------------------------|---------------------------|
| 1              | 12.23                      | 17.76                       | 25.15                     | 36.13                     |
| 2              | 12.32                      | 17.11                       | 26.23                     | 36.9                      |
| 3              | 11.85                      | 17                          | 25.27                     | 37.05                     |
| 4              | 12.56                      | 16.85                       | 26.23                     | 37.96                     |
| 5              | 13.32                      | 16.85                       | 25.94                     | 37.42                     |
| 6              | 12.83                      | 17.4                        | 26.83                     | 37.3                      |
| 7              | 11.3                       | 16.7                        | 27.35                     | 37.45                     |
| 8              | 11.1                       | 17.4                        | 25.42                     | 36.92                     |
| 9              | 10.37                      | 16.74                       | 24.7                      | 37.13                     |
| 10             | 12.8                       | 17.64                       | 24.63                     | 36.63                     |

|         |       |       |       |       |
|---------|-------|-------|-------|-------|
| 11      | 9.73  | 16.53 | 23.8  | 38.48 |
| 12      | 9.37  | 15.3  | 24    | 37.6  |
| 13      | 10    | 15.97 | 24.31 | 38.44 |
| 14      | 10.5  | 16.05 | 23.66 | 38    |
| 15      | 10.24 | 15.48 | 22.77 | 38.42 |
| 16      | 10.45 | 16.25 | 23.84 | 38.33 |
| 17      | 9.45  | 16.51 | 23.93 | 37.77 |
| 18      | 9.81  | 15.39 | 23.96 | 37.97 |
| 19      | 9.83  | 15.71 | 24.08 | 37.66 |
| 20      | 9.48  | 15.24 | 23.29 | 37.21 |
| 21      | 10    | 16.09 | 23.88 | 37.72 |
| 22      | 10.49 | 15    | 23.92 | 38.89 |
| 23      | 10.39 | 14.95 | 23.94 | 37.75 |
| 24      | 10.95 | 15.28 | 23.11 | 38.28 |
| 25      | 10.72 | 16.31 | 22.88 | 36.92 |
| 26      | 9.76  | 15.97 | 23.1  | 38.1  |
| 27      | 10.72 | 16.67 | 24.3  | 38.42 |
| 28      | 9.96  | 17.2  | 23.91 | 38.09 |
| 29      | 10.78 | 15.79 | 23.53 | 38.48 |
| 30      | 10.85 | 17.11 | 23.85 | 38.51 |
| Average | 10.81 | 16.34 | 24.39 | 37.73 |
| STDEV   | 1.12  | 0.81  | 1.17  | 0.67  |
| CV(%)   | 10.33 | 4.98  | 4.79  | 1.77  |

Summarizing the data in Table A1, we can obtain the data shown in Fig.B1.

|                                   |        |
|-----------------------------------|--------|
| N(Test Number)                    | 120    |
| Slope                             | 1.5541 |
| Y-intercept                       | 0.6366 |
| Correlation Coefficient ( $R^2$ ) | 0.9902 |

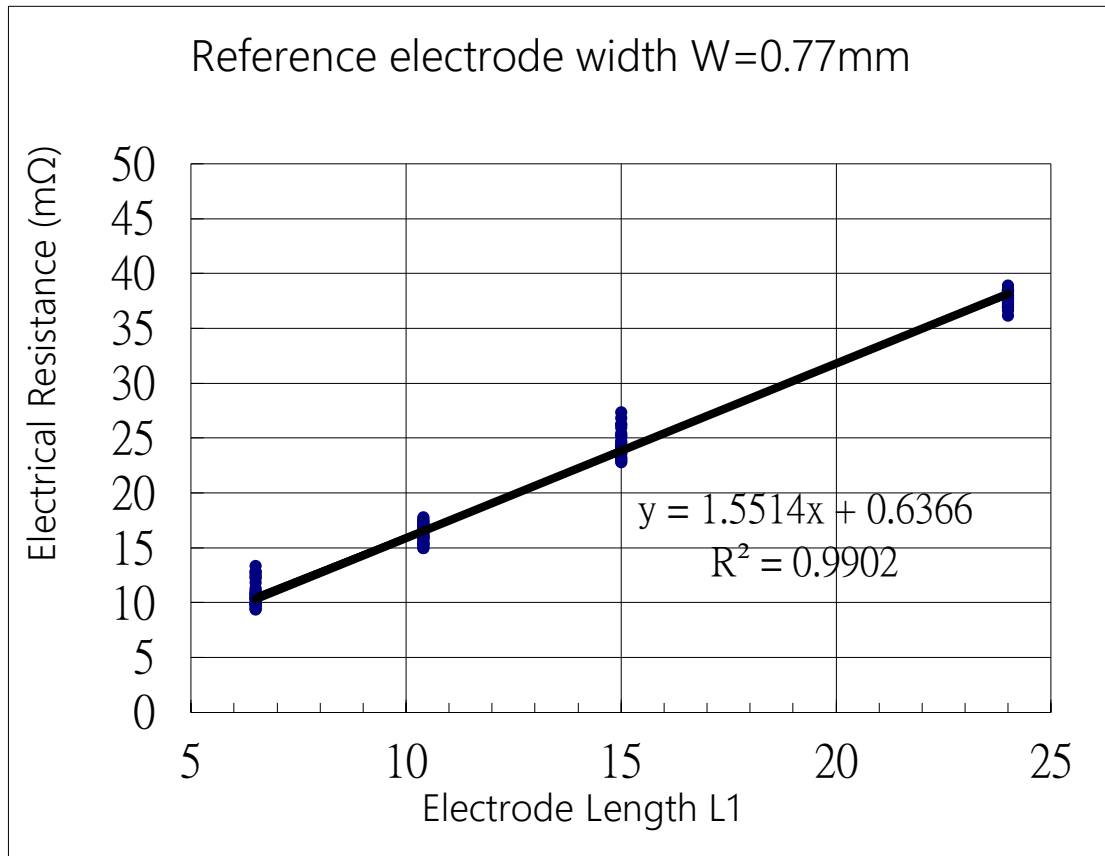

Fig.B1 shows the relationship between electrical resistance of the electrode and electrode length when the reference electrode width is 0.77mm.

Table A2 shows the electrical resistance for different reference electrode length of the 24mm, 15mm, 10.4mm, 6.5mm, when the electrode width is 0.62mm. (Unit: :mΩ)

| Test Strip No. | Electrode length L1= 6.5mm | Electrode length L1= 10.4mm | Electrode length L1= 15mm | Electrode length L1= 24mm |
|----------------|----------------------------|-----------------------------|---------------------------|---------------------------|
| 1              | 11.64                      | 18.46                       | 27.59                     | 45.12                     |
| 2              | 12.45                      | 18.89                       | 27.04                     | 45                        |
| 3              | 12.23                      | 19                          | 27.75                     | 44.54                     |
| 4              | 11.55                      | 19.2                        | 28.42                     | 44.92                     |
| 5              | 10.86                      | 19.13                       | 29.35                     | 44.79                     |
| 6              | 12.15                      | 18.54                       | 28.07                     | 43.93                     |
| 7              | 11.85                      | 18.41                       | 27.67                     | 44.31                     |
| 8              | 11.67                      | 18.58                       | 27.33                     | 43.91                     |
| 9              | 11.42                      | 18.64                       | 26.95                     | 44.53                     |
| 10             | 10.39                      | 18.08                       | 26.85                     | 44.49                     |

|         |       |       |        |       |
|---------|-------|-------|--------|-------|
| 11      | 11.42 | 19.06 | 27.83  | 44.31 |
| 12      | 11.41 | 18.75 | 28.07  | 42.87 |
| 13      | 11.5  | 17.68 | 27.37  | 44.56 |
| 14      | 11.08 | 17.79 | 27.47  | 44.04 |
| 15      | 11.52 | 17.24 | 27.94  | 44.45 |
| 16      | 11.08 | 17.82 | 28.24  | 43.53 |
| 17      | 11.95 | 17.06 | 27.91  | 44.21 |
| 18      | 10.8  | 17.63 | 27.28  | 43.61 |
| 19      | 10.57 | 18    | 26.78  | 43.31 |
| 20      | 10.42 | 17.08 | 28     | 42.9  |
| 21      | 10.38 | 18.92 | 27.16  | 44.65 |
| 22      | 10.63 | 18.15 | 27.05  | 43.31 |
| 23      | 10.59 | 18.12 | 27.12  | 43.95 |
| 24      | 10.11 | 16.7  | 26.46  | 43.88 |
| 25      | 10.41 | 17.86 | 26.9   | 42.85 |
| 26      | 10.2  | 19.04 | 27.6   | 44.42 |
| 27      | 11.3  | 18.52 | 26.29  | 43.65 |
| 28      | 10.22 | 16.95 | 27.08  | 43.35 |
| 29      | 10.5  | 16.72 | 27.41  | 43.61 |
| 30      | 9.82  | 17.91 | 27.02  | 42.69 |
| Average | 11.07 | 18.13 | 27.467 | 43.99 |
| STDEV   | 0.70  | 0.75  | 0.63   | 0.68  |
| CV(%)   | 6.36  | 4.15  | 2.30   | 1.55  |

Summarizing the data in Table A2, we can obtain the data shown in Fig.B2.

|                                      |         |
|--------------------------------------|---------|
| N(Test Number)                       | 120     |
| Slope                                | 1.8893  |
| Y-intercept                          | -1.2389 |
| Correlation<br>Coefficient ( $R^2$ ) | 0.9841  |

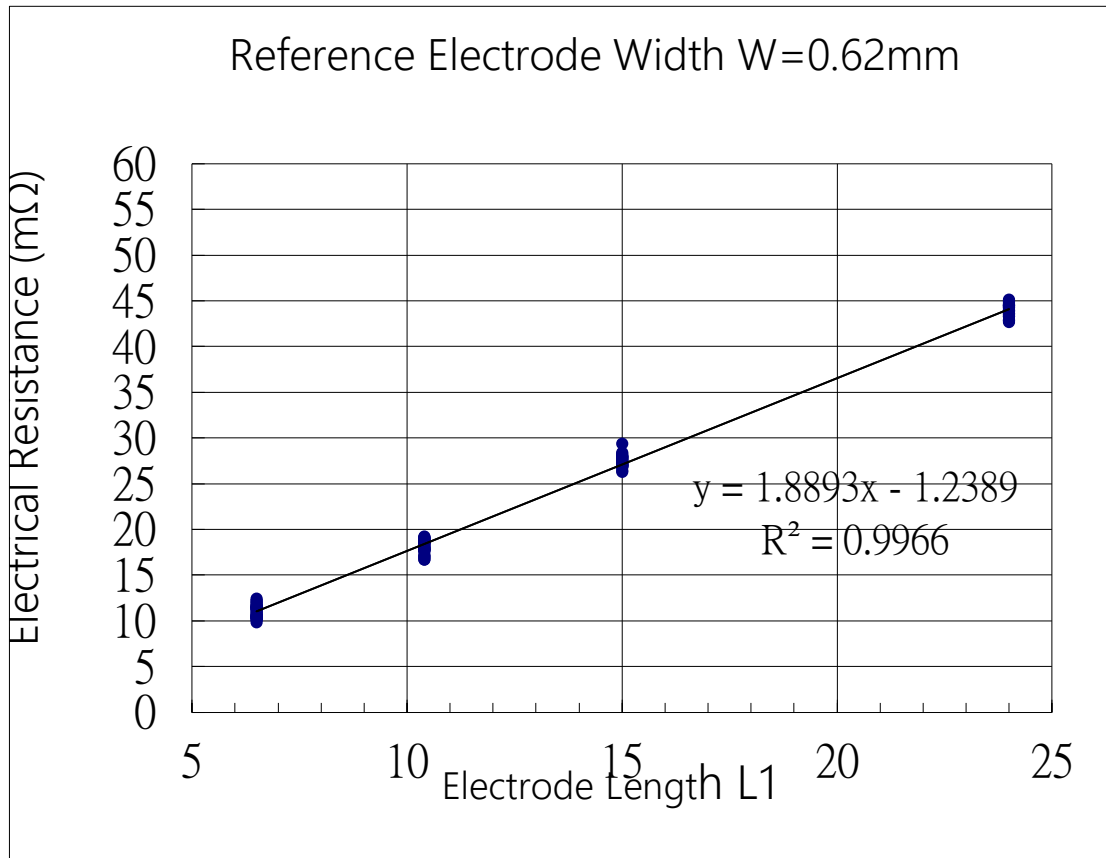

Fig.B2 shows the relationship between electrical resistance of the electrode and electrode length when the reference electrode width is 0.62mm.

Table A3 shows the electrical resistance for different reference electrode length of the 24mm, 15mm, 10.4mm, 6.5mm, when the electrode width is 0.426mm. (Unit: :mΩ)

| Test Strip No. | Electrode length L1= 6.5mm | Electrode length L1= 10.4mm | Electrode length L1= 15mm | Electrode length L1= 24mm |
|----------------|----------------------------|-----------------------------|---------------------------|---------------------------|
| 1              | 14.2                       | 22.75                       | 36.7                      | 62.29                     |
| 2              | 13.2                       | 24.11                       | 37.5                      | 62.25                     |
| 3              | 13.41                      | 22.83                       | 37                        | 62.45                     |
| 4              | 13.31                      | 24.38                       | 36.52                     | 62.42                     |
| 5              | 13.31                      | 23.53                       | 37.11                     | 61.46                     |
| 6              | 13.68                      | 24.44                       | 37.32                     | 62.65                     |
| 7              | 13.42                      | 23.03                       | 36.59                     | 61.17                     |
| 8              | 13.59                      | 23.24                       | 36.84                     | 61.01                     |
| 9              | 13.31                      | 23.03                       | 36.44                     | 60.78                     |
| 10             | 13.46                      | 22.91                       | 36.07                     | 61.03                     |
| 11             | 13.67                      | 24.27                       | 35.65                     | 63.4                      |

|         |       |       |       |       |
|---------|-------|-------|-------|-------|
| 12      | 13.15 | 25.35 | 34.8  | 60.84 |
| 13      | 13.18 | 24.09 | 35.3  | 61.72 |
| 14      | 13.28 | 24.3  | 34.7  | 61.74 |
| 15      | 12.54 | 23.77 | 35.68 | 61.45 |
| 16      | 12.21 | 23.64 | 36.23 | 61.23 |
| 17      | 13.21 | 24.08 | 35.38 | 61.76 |
| 18      | 12.57 | 23.94 | 36.15 | 61.23 |
| 19      | 12.59 | 23.56 | 35.66 | 61.45 |
| 20      | 13.05 | 22.39 | 35.4  | 60.69 |
| 21      | 12.35 | 24.3  | 37.31 | 62.57 |
| 22      | 13.5  | 23.28 | 37.18 | 61.14 |
| 23      | 12.87 | 23.58 | 36.1  | 60.22 |
| 24      | 12.05 | 24.16 | 37.16 | 60.59 |
| 25      | 12.39 | 22.75 | 37.01 | 59.24 |
| 26      | 13    | 21.5  | 36.85 | 60.88 |
| 27      | 13.08 | 21.6  | 36.55 | 60.4  |
| 28      | 12.15 | 22.44 | 35.57 | 60    |
| 29      | 12.23 | 22.3  | 35.91 | 59.87 |
| 30      | 11.9  | 22.62 | 35.71 | 59.49 |
| Average | 13.00 | 23.41 | 36.28 | 61.25 |
| STDEV   | 0.57  | 0.89  | 0.78  | 0.98  |
| CV(%)   | 4.39  | 3.82  | 2.14  | 1.60  |

Summarizing the data in Table A3, we can obtain the data shown in Fig.B3.

|                                   |         |
|-----------------------------------|---------|
| N(Test Number)                    | 120     |
| Slope                             | 2.7635  |
| Y-intercept                       | -5.1385 |
| Correlation Coefficient ( $R^2$ ) | 0.998   |

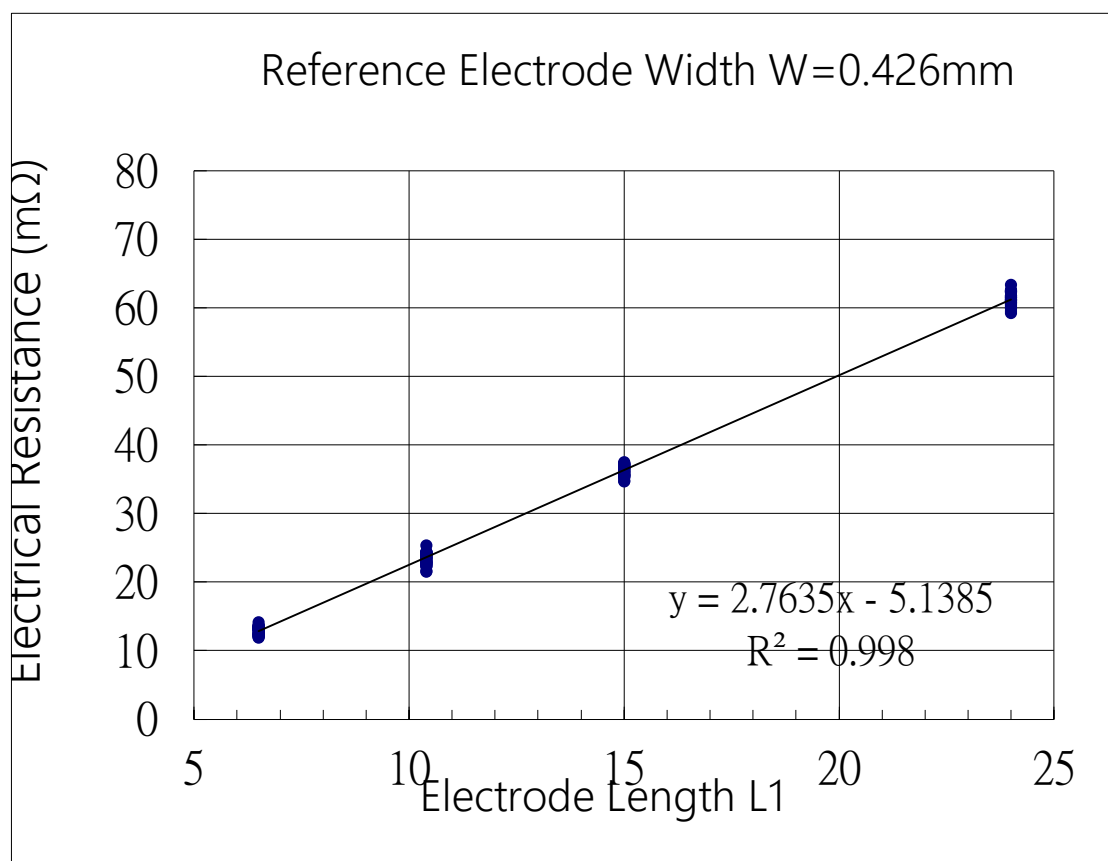

Fig.B3 shows the relationship between electrical resistance of the electrode and electrode length when the reference electrode width is 0.426mm.

Table A4 shows the electrical resistance for different reference electrode length of the 24mm, 15mm, 10.4mm, 6.5mm, when the electrode width is 0.206mm. (Unit: :mΩ)

| Test Strip No. | Electrode length L1= 6.5mm | Electrode length L1= 10.4mm | Electrode length L1= 15mm | Electrode length L1= 24mm |
|----------------|----------------------------|-----------------------------|---------------------------|---------------------------|
| 1              | 17.73                      | 41.16                       | 67.05                     | 122.14                    |
| 2              | 18.75                      | 40.55                       | 68.87                     | 115.89                    |
| 3              | 18.97                      | 41.12                       | 69.71                     | 119.63                    |
| 4              | 18.6                       | 39.87                       | 66.78                     | 115.84                    |
| 5              | 18.95                      | 40.45                       | 66.83                     | 113.93                    |
| 6              | 19.16                      | 40.61                       | 65.87                     | 112.45                    |
| 7              | 18.56                      | 40.3                        | 65.87                     | 114.78                    |
| 8              | 18.71                      | 39.03                       | 67.62                     | 115.75                    |
| 9              | 19.04                      | 40.23                       | 66.52                     | 116.42                    |
| 10             | 18.63                      | 39.84                       | 65.28                     | 114.53                    |
| 11             | 18.74                      | 41.63                       | 66.74                     | 117.89                    |

|         |       |       |       |        |
|---------|-------|-------|-------|--------|
| 12      | 18.5  | 40.45 | 67.08 | 118.52 |
| 13      | 18.51 | 40.39 | 66.98 | 116.36 |
| 14      | 18.99 | 41.5  | 65.64 | 118.45 |
| 15      | 18.51 | 39.54 | 67.42 | 113.55 |
| 16      | 18.84 | 39.4  | 65.35 | 115.15 |
| 17      | 18.36 | 40.18 | 64.31 | 114.3  |
| 18      | 19.43 | 40.08 | 66.38 | 113.52 |
| 19      | 18.61 | 41.97 | 65.87 | 114.98 |
| 20      | 18.13 | 40.23 | 64.43 | 114.28 |
| 21      | 18.61 | 40.87 | 65.47 | 120.06 |
| 22      | 18.55 | 39.65 | 67.6  | 117.61 |
| 23      | 18.19 | 41.42 | 66.58 | 121.04 |
| 24      | 18.47 | 41.33 | 64.52 | 117.43 |
| 25      | 18.33 | 40.26 | 65.55 | 115.5  |
| 26      | 18.67 | 38.97 | 64.46 | 115.82 |
| 27      | 17.65 | 39.64 | 64.59 | 115.1  |
| 28      | 18.25 | 39.21 | 65.16 | 115.23 |
| 29      | 18.19 | 39.72 | 65.87 | 116.2  |
| 30      | 17.03 | 39.5  | 63.96 | 113.36 |
| Average | 18.52 | 40.30 | 66.15 | 116.19 |
| STDEV   | 0.47  | 0.80  | 1.35  | 2.36   |
| CV(%)   | 2.56  | 1.98  | 2.04  | 2.03   |

Summarizing the data in Table A4, we can obtain the data shown in Fig.B4.

|                                   |         |
|-----------------------------------|---------|
| N(Test Number)                    | 120     |
| Slope                             | 5.5818  |
| Y-intercept                       | -17.716 |
| Correlation Coefficient ( $R^2$ ) | 0.9985  |



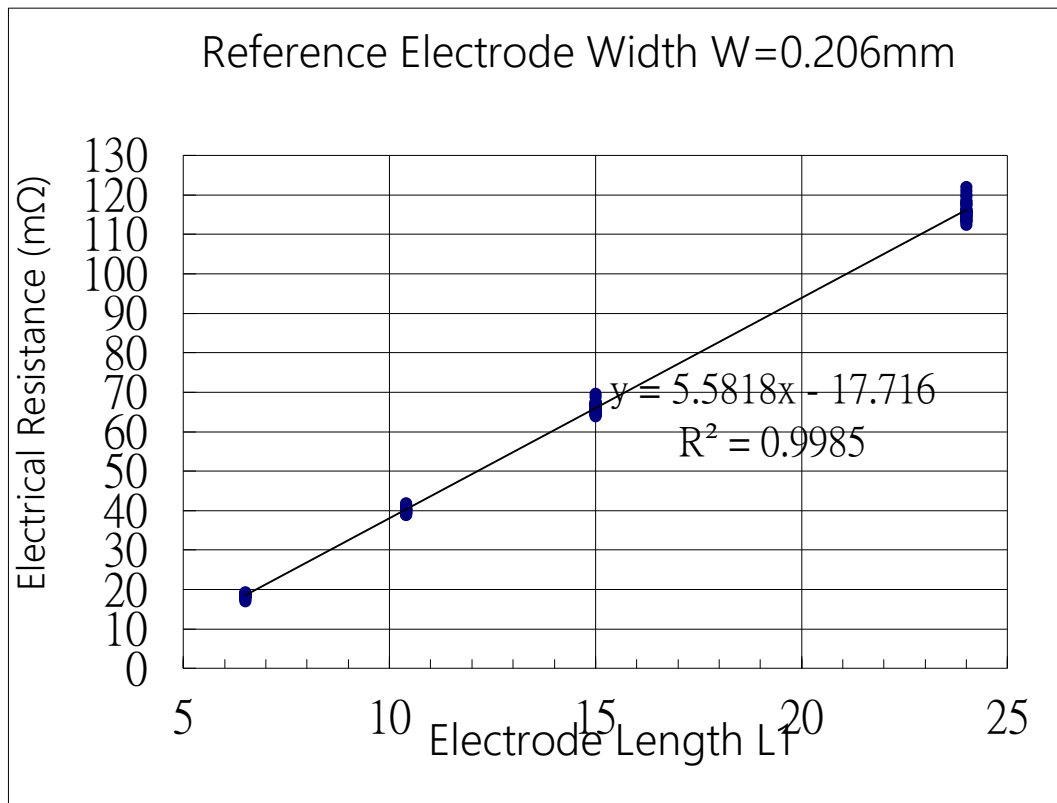

Fig.B4 shows the relationship between electrical resistance of the electrode and electrode length when the reference electrode width is 0.206mm.

## (2) Second reference data

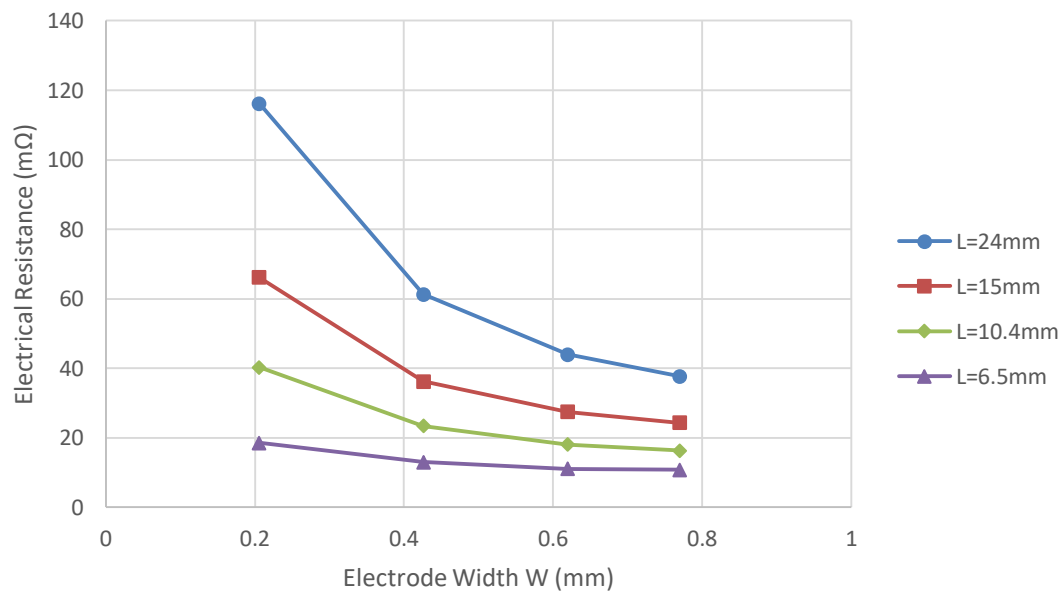

Fig.6 shows the relationship between the average electrical resistance and reference electrode width for 4 different reference electrode lengths. The Fig.6 in the submitted paper was obtained from the following Tables C1 to C4 and Figures D1 to D4.

Table C1 shows the electrical resistance for different reference electrode widths of 0.206mm, 0.426mm, 0.62mm, and 0.77mm, when the electrode length L1 is 24mm. (Unit:mΩ)

|         | W= 0.206mm | W= 0.426mm | W= 0.62mm | W= 0.77mm |
|---------|------------|------------|-----------|-----------|
| 1       | 122.14     | 62.29      | 44.65     | 36.13     |
| 2       | 115.89     | 62.25      | 43.31     | 36.9      |
| 3       | 119.63     | 62.45      | 43.95     | 37.05     |
| 4       | 115.84     | 62.42      | 43.88     | 37.96     |
| 5       | 113.93     | 61.46      | 42.85     | 37.42     |
| 6       | 112.45     | 62.65      | 44.42     | 37.3      |
| 7       | 114.78     | 61.17      | 43.65     | 37.45     |
| 8       | 115.75     | 61.01      | 43.35     | 36.92     |
| 9       | 116.42     | 60.78      | 43.61     | 37.13     |
| 10      | 114.53     | 61.03      | 42.69     | 36.63     |
| 11      | 117.89     | 63.4       | 45.12     | 38.48     |
| 12      | 118.52     | 60.84      | 45        | 37.6      |
| 13      | 116.36     | 61.72      | 44.54     | 38.44     |
| 14      | 118.45     | 61.74      | 44.92     | 38        |
| 15      | 113.55     | 61.45      | 44.79     | 38.42     |
| 16      | 115.15     | 61.23      | 43.93     | 38.33     |
| 17      | 114.3      | 61.76      | 44.31     | 37.77     |
| 18      | 113.52     | 61.23      | 43.91     | 37.97     |
| 19      | 114.98     | 61.45      | 44.53     | 37.66     |
| 20      | 114.28     | 60.69      | 44.49     | 37.21     |
| 21      | 120.06     | 62.57      | 44.31     | 37.72     |
| 22      | 117.61     | 61.14      | 42.87     | 38.89     |
| 23      | 121.04     | 60.22      | 44.56     | 37.75     |
| 24      | 117.43     | 60.59      | 44.04     | 38.28     |
| 25      | 115.5      | 59.24      | 44.45     | 36.92     |
| 26      | 115.82     | 60.88      | 43.53     | 38.1      |
| 27      | 115.1      | 60.4       | 44.21     | 38.42     |
| 28      | 115.23     | 60         | 43.61     | 38.09     |
| 29      | 116.2      | 59.87      | 43.31     | 38.48     |
| 30      | 113.36     | 59.49      | 42.9      | 38.51     |
| Average | 116.19     | 61.25      | 43.99     | 37.73     |
| STDEV   | 2.36       | 0.98       | 0.68      | 0.67      |

|       |      |      |      |      |
|-------|------|------|------|------|
| CV(%) | 2.03 | 1.60 | 1.55 | 1.77 |
|-------|------|------|------|------|

Summarizing the data in Table C1, we can obtain the data shown in Fig.D1.

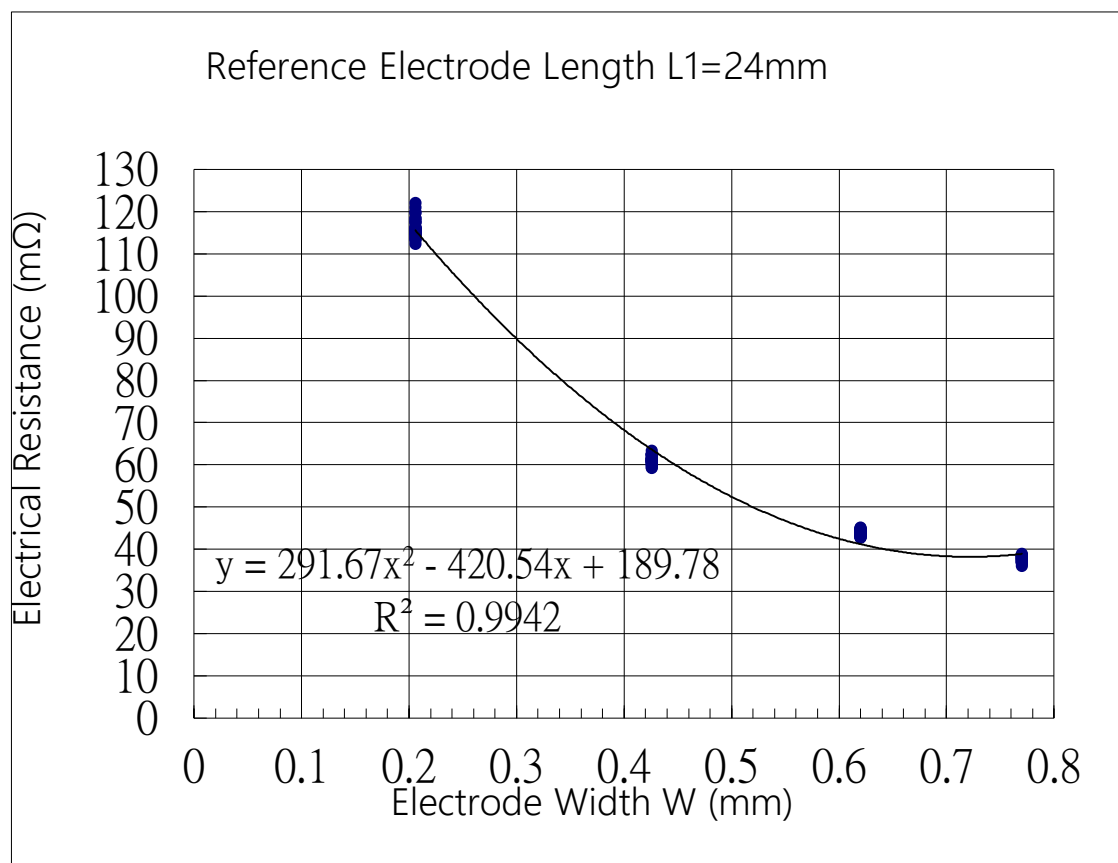

Fig.D1 shows the relationship between electrical resistance of the electrode and electrode width when the reference electrode length L1 is 24mm.

Table C2 shows the electrical resistance for different reference electrode widths of 0.206mm, 0.426mm, 0.62mm, and 0.77mm, when the electrode length L1 is 15mm. (Unit: :mΩ)

|   | W= 0.206mm | W= 0.426mm | W= 0.62mm | W= 0.77mm |
|---|------------|------------|-----------|-----------|
| 1 | 67.05      | 37.31      | 27.59     | 25.15     |
| 2 | 68.87      | 37.18      | 27.04     | 26.23     |
| 3 | 69.71      | 36.1       | 27.75     | 25.27     |
| 4 | 66.78      | 37.16      | 28.42     | 26.23     |
| 5 | 66.83      | 37.01      | 29.35     | 25.94     |
| 6 | 65.87      | 36.85      | 28.07     | 26.83     |
| 7 | 65.87      | 36.55      | 27.67     | 27.35     |
| 8 | 67.62      | 35.57      | 27.33     | 25.42     |
| 9 | 66.52      | 35.91      | 26.95     | 24.7      |

|         |       |       |       |       |
|---------|-------|-------|-------|-------|
| 10      | 65.28 | 35.71 | 26.85 | 24.63 |
| 11      | 66.74 | 36.7  | 27.83 | 23.8  |
| 12      | 67.08 | 37.5  | 28.07 | 24    |
| 13      | 66.98 | 37    | 27.37 | 24.31 |
| 14      | 65.64 | 36.52 | 27.47 | 23.66 |
| 15      | 67.42 | 37.11 | 27.94 | 22.77 |
| 16      | 65.35 | 37.32 | 28.24 | 23.84 |
| 17      | 64.31 | 36.59 | 27.91 | 23.93 |
| 18      | 66.38 | 36.84 | 27.28 | 23.96 |
| 19      | 65.87 | 36.44 | 26.78 | 24.08 |
| 20      | 64.43 | 36.07 | 28    | 23.29 |
| 21      | 65.47 | 35.65 | 27.16 | 23.88 |
| 22      | 67.6  | 34.8  | 27.05 | 23.92 |
| 23      | 66.58 | 35.3  | 27.12 | 23.94 |
| 24      | 64.52 | 34.7  | 26.46 | 23.11 |
| 25      | 65.55 | 35.68 | 26.9  | 22.88 |
| 26      | 64.46 | 36.23 | 27.6  | 23.1  |
| 27      | 64.59 | 35.38 | 26.29 | 24.3  |
| 28      | 65.16 | 36.15 | 27.08 | 23.91 |
| 29      | 65.87 | 35.66 | 27.41 | 23.53 |
| 30      | 63.96 | 35.4  | 27.02 | 23.85 |
| Average | 66.15 | 36.28 | 27.47 | 24.39 |
| STDEV   | 1.35  | 0.78  | 0.63  | 1.17  |
| CV(%)   | 2.04  | 2.14  | 2.30  | 4.79  |

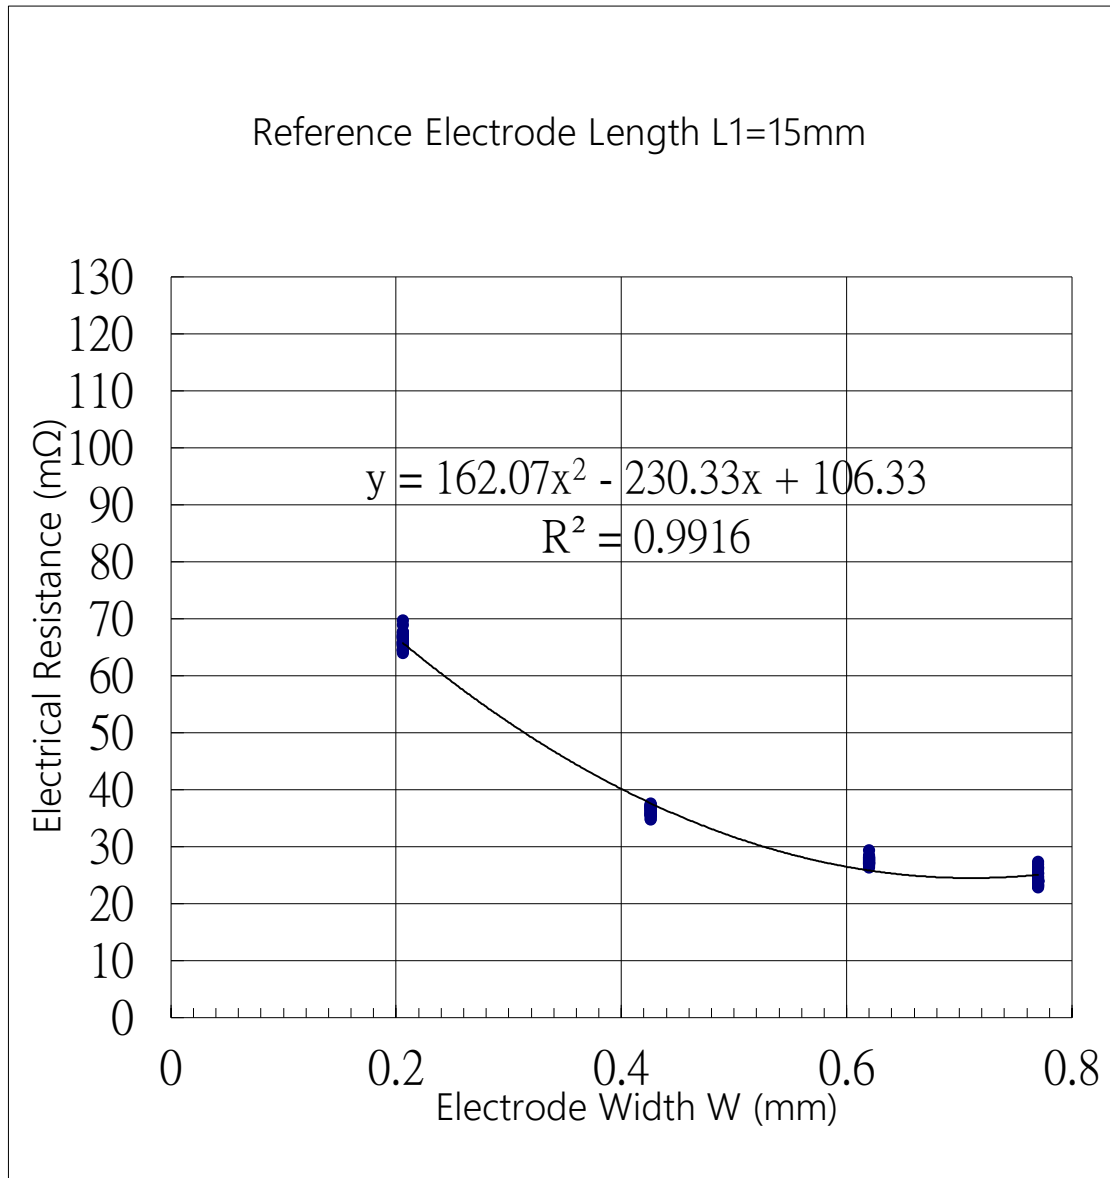

Fig.D2 shows the electrical resistance for different reference electrode widths of 0.206mm, 0.426mm, 0.62mm, and 0.77mm, when the electrode length L1 is 15mm.

Table C3 shows the electrical resistance for different reference electrode widths of 0.206mm, 0.426mm, 0.62mm, and 0.77mm, when the electrode length L1 is 10.4mm. (Unit: :mΩ)

|   | W= 0.206mm | W= 0.426mm | W= 0.62mm | W= 0.77mm |
|---|------------|------------|-----------|-----------|
| 1 | 41.16      | 22.75      | 18.46     | 17.76     |
| 2 | 40.55      | 24.11      | 18.89     | 17.11     |
| 3 | 41.12      | 22.83      | 19        | 17        |
| 4 | 39.87      | 24.38      | 19.2      | 16.85     |
| 5 | 40.45      | 23.53      | 19.13     | 16.85     |

|         |       |       |       |       |
|---------|-------|-------|-------|-------|
| 6       | 40.61 | 24.44 | 18.54 | 17.4  |
| 7       | 40.3  | 23.03 | 18.41 | 16.7  |
| 8       | 39.03 | 23.24 | 18.58 | 17.4  |
| 9       | 40.23 | 23.03 | 18.64 | 16.74 |
| 10      | 39.84 | 22.91 | 18.08 | 17.64 |
| 11      | 41.63 | 24.27 | 19.06 | 16.53 |
| 12      | 40.45 | 25.35 | 18.75 | 15.3  |
| 13      | 40.39 | 24.09 | 17.68 | 15.97 |
| 14      | 41.5  | 24.3  | 17.79 | 16.05 |
| 15      | 39.54 | 23.77 | 17.24 | 15.48 |
| 16      | 39.4  | 23.64 | 17.82 | 16.25 |
| 17      | 40.18 | 24.08 | 17.06 | 16.51 |
| 18      | 40.08 | 23.94 | 17.63 | 15.39 |
| 19      | 41.97 | 23.56 | 18    | 15.71 |
| 20      | 40.23 | 22.39 | 17.08 | 15.24 |
| 21      | 40.87 | 24.3  | 18.92 | 16.09 |
| 22      | 39.65 | 23.28 | 18.15 | 15    |
| 23      | 41.42 | 23.58 | 18.12 | 14.95 |
| 24      | 41.33 | 24.16 | 16.7  | 15.28 |
| 25      | 40.26 | 22.75 | 17.86 | 16.31 |
| 26      | 38.97 | 21.5  | 19.04 | 15.97 |
| 27      | 39.64 | 21.6  | 18.52 | 16.67 |
| 28      | 39.21 | 22.44 | 16.95 | 17.2  |
| 29      | 39.72 | 22.3  | 16.72 | 15.79 |
| 30      | 39.5  | 22.62 | 17.91 | 17.11 |
| Average | 40.30 | 23.41 | 18.13 | 16.34 |
| STDEV   | 0.80  | 0.89  | 0.75  | 0.81  |
| CV(%)   | 1.98  | 3.82  | 4.15  | 4.98  |

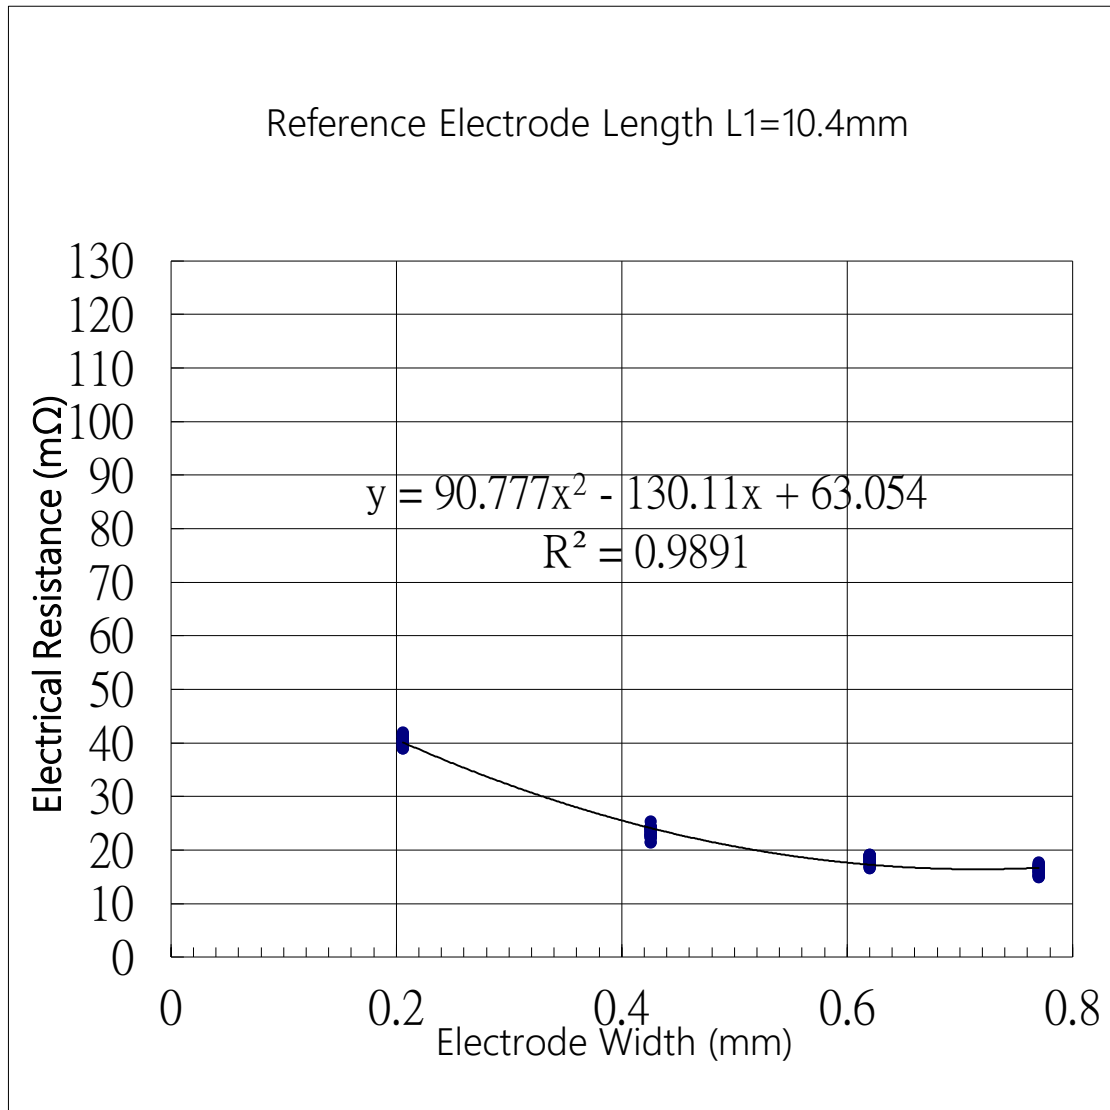

Fig. D3 shows the electrical resistance for different reference electrode widths of 0.206mm, 0.426mm, 0.62mm, and 0.77mm, when the electrode length L1 is 10.4mm.

Table C4 shows the electrical resistance for different reference electrode widths of 0.206mm, 0.426mm, 0.62mm, and 0.77mm, when the electrode length L1 is 6.5mm. (Unit: :mΩ)

|   | W= 0.206mm | W= 0.426mm | W= 0.62mm | W= 0.77mm |
|---|------------|------------|-----------|-----------|
| 1 | 17.73      | 14.2       | 11.64     | 12.23     |
| 2 | 18.75      | 13.2       | 12.45     | 12.32     |
| 3 | 18.97      | 13.41      | 12.23     | 11.85     |
| 4 | 18.6       | 13.31      | 11.55     | 12.56     |
| 5 | 18.95      | 13.31      | 10.86     | 13.32     |
| 6 | 19.16      | 13.68      | 12.15     | 12.83     |

|         |       |       |       |       |
|---------|-------|-------|-------|-------|
| 7       | 18.56 | 13.42 | 11.85 | 11.3  |
| 8       | 18.71 | 13.59 | 11.67 | 11.1  |
| 9       | 19.04 | 13.31 | 11.42 | 10.37 |
| 10      | 18.63 | 13.46 | 10.39 | 12.8  |
| 11      | 18.74 | 13.67 | 11.42 | 9.73  |
| 12      | 18.5  | 13.15 | 11.41 | 9.37  |
| 13      | 18.51 | 13.18 | 11.5  | 10    |
| 14      | 18.99 | 13.28 | 11.08 | 10.5  |
| 15      | 18.51 | 12.54 | 11.52 | 10.24 |
| 16      | 18.84 | 12.21 | 11.08 | 10.45 |
| 17      | 18.36 | 13.21 | 11.95 | 9.45  |
| 18      | 19.43 | 12.57 | 10.8  | 9.81  |
| 19      | 18.61 | 12.59 | 10.57 | 9.83  |
| 20      | 18.13 | 13.05 | 10.42 | 9.48  |
| 21      | 18.61 | 12.35 | 10.38 | 10    |
| 22      | 18.55 | 13.5  | 10.63 | 10.49 |
| 23      | 18.19 | 12.87 | 10.59 | 10.39 |
| 24      | 18.47 | 12.05 | 10.11 | 10.95 |
| 25      | 18.33 | 12.39 | 10.41 | 10.72 |
| 26      | 18.67 | 13    | 10.2  | 9.76  |
| 27      | 17.65 | 13.08 | 11.3  | 10.72 |
| 28      | 18.25 | 12.15 | 10.22 | 9.96  |
| 29      | 18.19 | 12.23 | 10.5  | 10.78 |
| 30      | 17.03 | 11.9  | 9.82  | 10.85 |
| Average | 18.52 | 13.00 | 11.07 | 10.81 |
| STDEV   | 0.47  | 0.57  | 0.70  | 1.12  |
| CV(%)   | 2.56  | 4.39  | 6.36  | 10.33 |



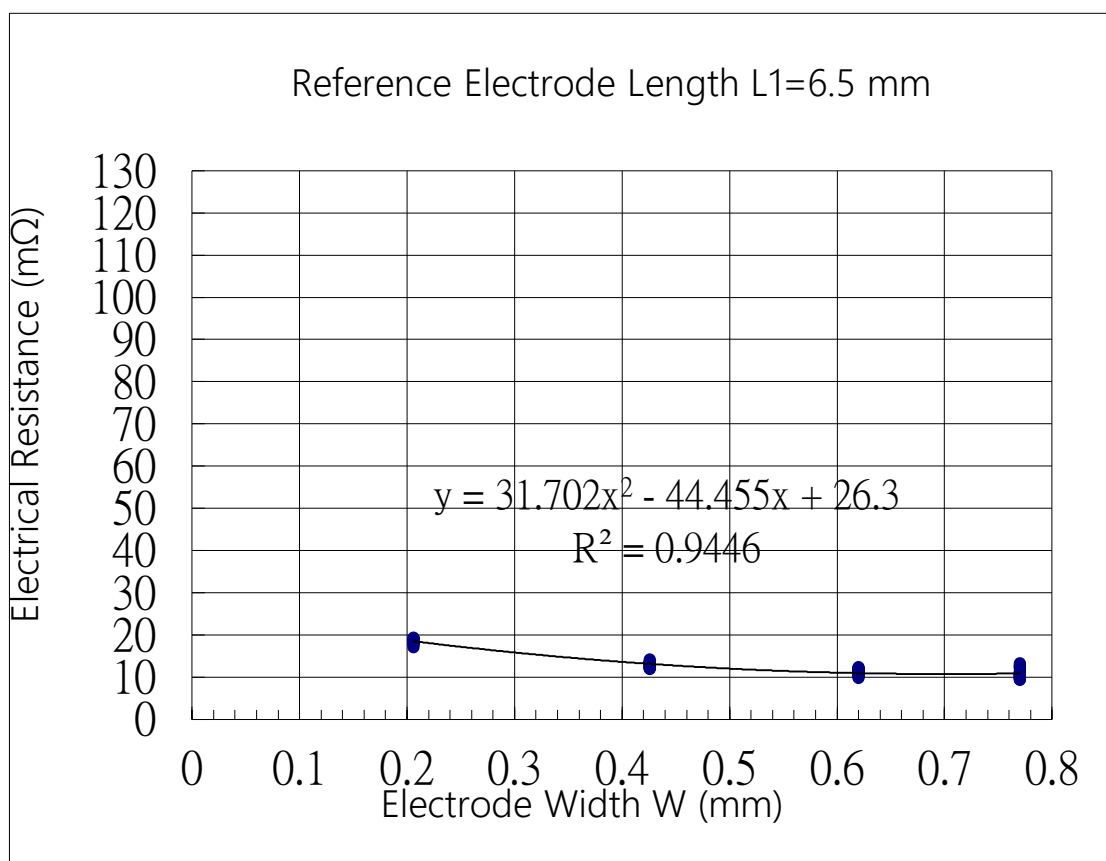

Fig.D4 shows the electrical resistance for different reference electrode widths of 0.206mm, 0.426mm, 0.62mm, and 0.77mm, when the electrode length L1 is 6.5mm.

### (3) Third reference data

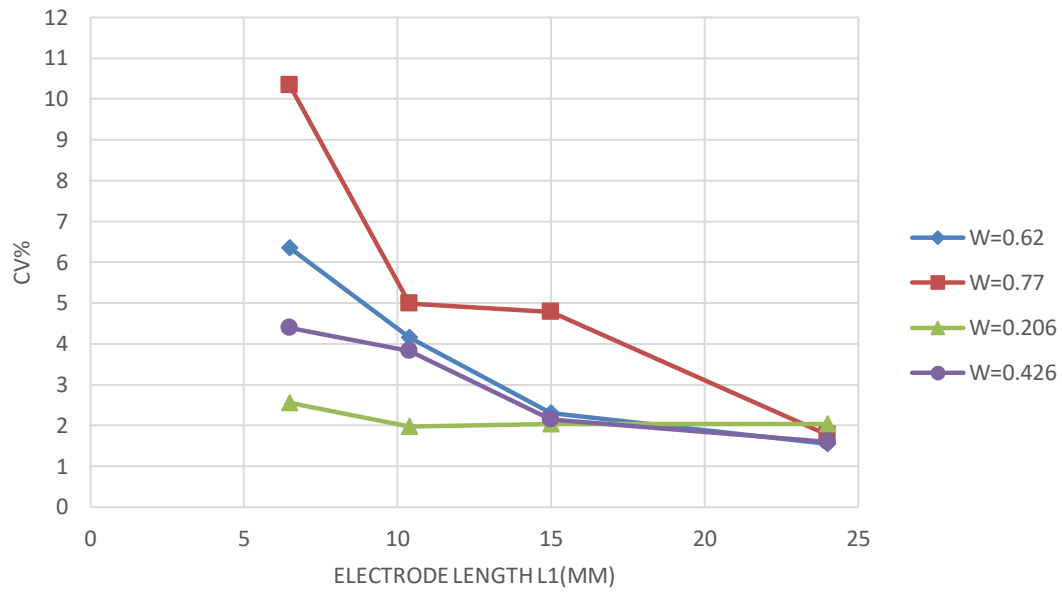

Fig.7 CV in electrical resistance against electrode length for different reference electrode width for the reference electrodes.

This Fig.7 in the submitted paper was obtained from the following Tables E1 which is the summary of Table A1 to A4.

Table E1 CV on electrical resistance for reference electrodes with various length and width. (Unit:%).

|                | W=0.206mm | W=0.426mm | W=0.62mm | W=0.77mm |
|----------------|-----------|-----------|----------|----------|
| CV (L1=24mm)   | 2.03      | 1.6       | 1.55     | 1.77     |
| CV (L1=15mm)   | 2.04      | 2.14      | 2.30     | 4.79     |
| CV (L1=10.4mm) | 1.98      | 3.82      | 4.15     | 4.98     |
| CV (L1=6.5mm)  | 2.56      | 4.39      | 6.36     | 10.33    |

#### (4) Fourth Reference Data

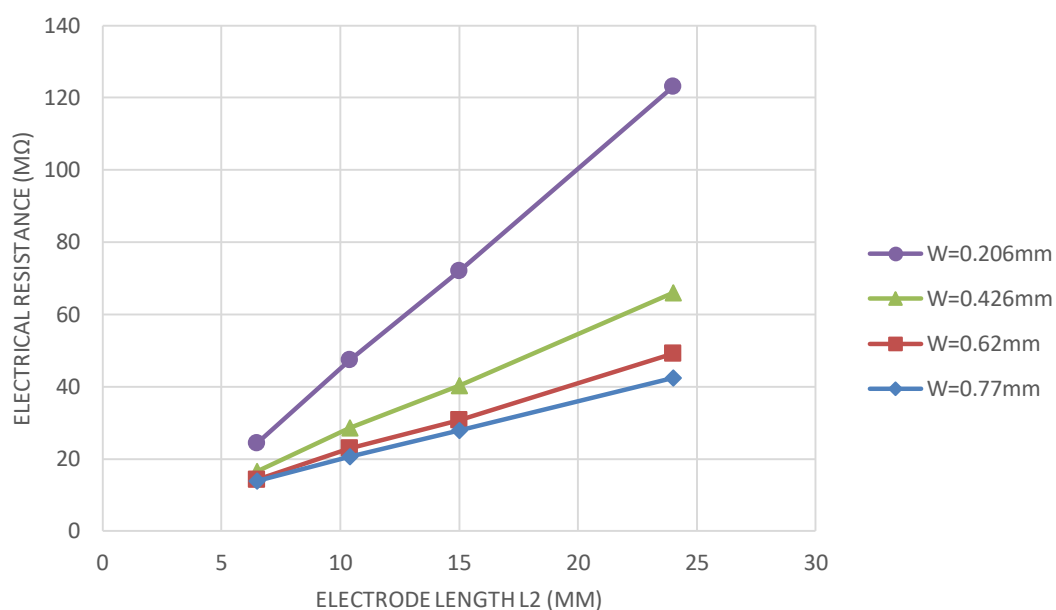

Fig.8 shows the relationship between the average electrical resistance of the working electrode and electrode length for 4 different electrode widths.

This Fig.8 in the submitted paper was obtained from the following Tables F1 to F4 and Figures G1 to G4.

Table F1 shows the electrical resistance for different working electrode length of the 24.65mm, 15.65mm, 11.05mm, 7.15mm, when the electrode width W is 0.77mm. (Unit: :mΩ)

| Test Strip No. | Electrode length L2= 7.15mm | Electrode length L2= 11.05mm | Electrode length L2= 15.65mm | Electrode length L2= 24.65mm |
|----------------|-----------------------------|------------------------------|------------------------------|------------------------------|
| 1              | 15.51                       | 20.72                        | 29                           | 42.16                        |
| 2              | 14.32                       | 20.09                        | 27.81                        | 41.85                        |
| 3              | 15.03                       | 19.61                        | 27.92                        | 42.05                        |
| 4              | 14.86                       | 19.61                        | 28.73                        | 42.5                         |
| 5              | 15.03                       | 18.87                        | 30.53                        | 41.12                        |
| 6              | 15.28                       | 20.86                        | 29.58                        | 42.76                        |
| 7              | 15.11                       | 20.72                        | 29.47                        | 41.7                         |
| 8              | 14.68                       | 20.82                        | 30.9                         | 41.16                        |
| 9              | 15.51                       | 20.72                        | 30.63                        | 42.04                        |
| 10             | 14.46                       | 20.33                        | 29.61                        | 42.7                         |
| 11             | 13.35                       | 20.92                        | 27.31                        | 42.78                        |

|                |       |       |       |       |
|----------------|-------|-------|-------|-------|
| <b>12</b>      | 13.62 | 20.25 | 27.37 | 42.93 |
| <b>13</b>      | 13.52 | 21.28 | 27.28 | 43.11 |
| <b>14</b>      | 13.42 | 20.35 | 27.26 | 41.3  |
| <b>15</b>      | 13.95 | 20.1  | 26.89 | 42.24 |
| <b>16</b>      | 13.96 | 20.25 | 27.63 | 43.5  |
| <b>17</b>      | 13.07 | 19.71 | 27.24 | 43.4  |
| <b>18</b>      | 13.14 | 20.1  | 26.51 | 43.34 |
| <b>19</b>      | 13.22 | 21.05 | 26.66 | 41.79 |
| <b>20</b>      | 13.23 | 20.27 | 27.71 | 41.98 |
| <b>21</b>      | 13.18 | 21.09 | 27.19 | 43.47 |
| <b>22</b>      | 13.15 | 20.75 | 26.5  | 42.78 |
| <b>23</b>      | 13.49 | 21.81 | 26.93 | 42.05 |
| <b>24</b>      | 13.14 | 20.87 | 26.95 | 41.15 |
| <b>25</b>      | 13.38 | 20.57 | 27.21 | 42.23 |
| <b>26</b>      | 13.16 | 21.88 | 26.59 | 42.35 |
| <b>27</b>      | 13.31 | 20.63 | 26.84 | 42.89 |
| <b>28</b>      | 13.48 | 20.77 | 27.01 | 43.03 |
| <b>29</b>      | 13.08 | 20.54 | 26.44 | 42.05 |
| <b>30</b>      | 12.92 | 21.35 | 26.7  | 42.8  |
| <b>Average</b> | 13.89 | 20.56 | 27.81 | 42.37 |
| <b>STDEV</b>   | 0.85  | 0.64  | 1.34  | 0.70  |
| <b>CV(%)</b>   | 6.11  | 3.12  | 4.80  | 1.65  |

Summarizing the data in Table F1, we can obtain the data shown in Fig.G1.

|                                      |        |
|--------------------------------------|--------|
| N                                    | 120    |
| Slope                                | 1.6215 |
| Y-intercept                          | 3.4977 |
| Correlation<br>Coefficient ( $R^2$ ) | 0.9926 |

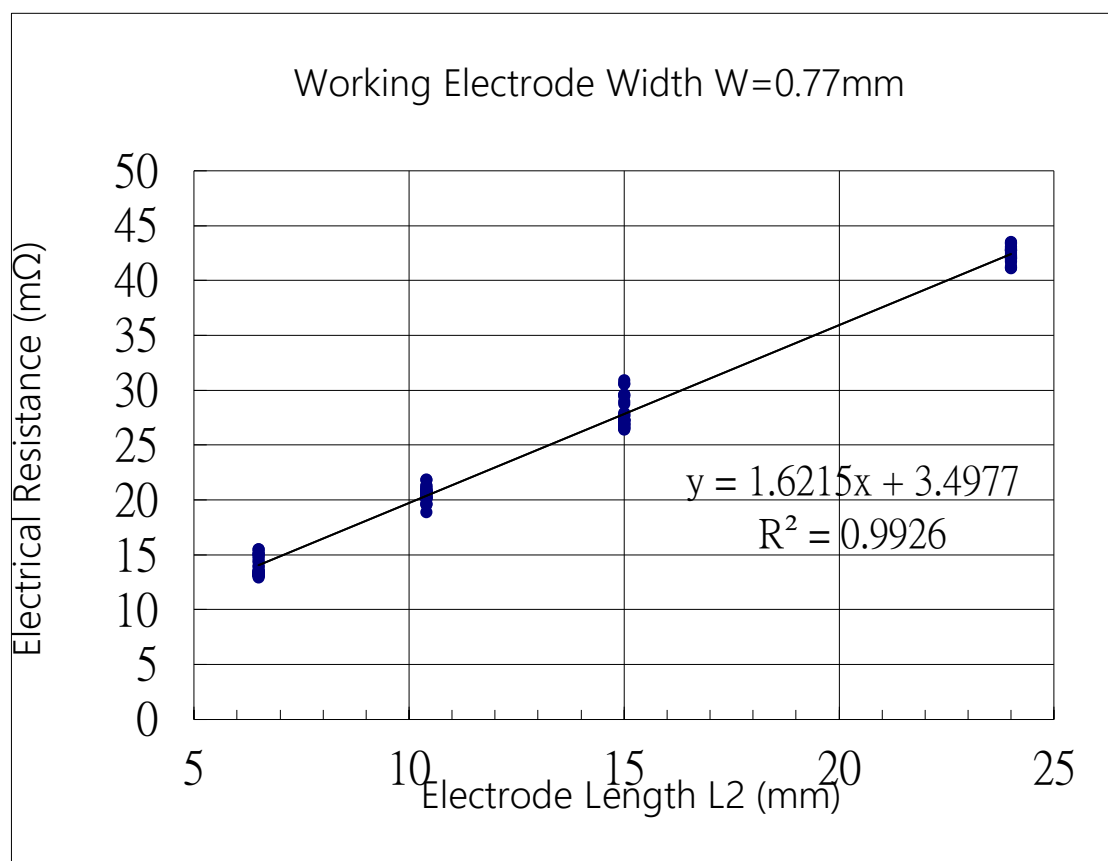

Fig.G1 shows the electrical resistance for different working electrode length when the electrode width W is 0.77mm.

Table F2 shows the electrical resistance for different working electrode length of the 24.65mm, 15.65mm, 11.05mm, 7.15mm, when the electrode width W is 0.62mm. (Unit: :mΩ)

| Test Strip No. | Electrode length L2= 7.15mm | Electrode length L2= 11.05mm | Electrode length L2= 15.65mm | Electrode length L2= 24.65mm |
|----------------|-----------------------------|------------------------------|------------------------------|------------------------------|
| 1              | 15.3                        | 23.58                        | 30.57                        | 48.86                        |
| 2              | 14.71                       | 23.36                        | 30.72                        | 49.65                        |
| 3              | 14.63                       | 22.85                        | 30.67                        | 50.51                        |
| 4              | 14.59                       | 22.42                        | 31.12                        | 49.95                        |
| 5              | 15.41                       | 22.75                        | 30.55                        | 49.32                        |
| 6              | 14.45                       | 23.54                        | 31.32                        | 48.43                        |
| 7              | 14.4                        | 22.01                        | 30.92                        | 48.41                        |
| 8              | 14.65                       | 24.26                        | 30.89                        | 48.47                        |
| 9              | 13.76                       | 24                           | 30.61                        | 47.85                        |
| 10             | 14.36                       | 23.71                        | 30.42                        | 48.23                        |
| 11             | 14.44                       | 22.95                        | 30.88                        | 50                           |

|         |       |       |       |       |
|---------|-------|-------|-------|-------|
| 12      | 14.62 | 22.73 | 30.89 | 49.81 |
| 13      | 14.58 | 23.38 | 30.95 | 49.44 |
| 14      | 14.13 | 23.27 | 31.13 | 51.17 |
| 15      | 13.91 | 25.24 | 31.18 | 50.74 |
| 16      | 14.26 | 23.63 | 31.14 | 48.11 |
| 17      | 14.15 | 23.14 | 31.4  | 49    |
| 18      | 14.07 | 22.5  | 30.75 | 49.09 |
| 19      | 13.97 | 22.48 | 31.61 | 48.69 |
| 20      | 14.02 | 23.38 | 31.11 | 48.82 |
| 21      | 14.16 | 23.05 | 30.3  | 48.49 |
| 22      | 13.73 | 22.68 | 30.25 | 50.77 |
| 23      | 14.08 | 22.59 | 30.62 | 49.48 |
| 24      | 14.1  | 22.91 | 30.49 | 49.42 |
| 25      | 14.03 | 23.32 | 30.38 | 49.84 |
| 26      | 14.23 | 21.53 | 30.55 | 48.56 |
| 27      | 14.15 | 22.68 | 30.78 | 48.23 |
| 28      | 13.9  | 21.46 | 30.46 | 48.56 |
| 29      | 14.25 | 21.63 | 30.76 | 47.77 |
| 30      | 13.56 | 21.65 | 30.77 | 47.07 |
| Average | 14.29 | 22.96 | 30.81 | 49.09 |
| STDEV   | 0.41  | 0.84  | 0.34  | 0.98  |
| CV(%)   | 2.89  | 3.64  | 1.09  | 1.99  |

Summarizing the data in Table F2, we can obtain the data shown in Fig.G2.

|                                      |        |
|--------------------------------------|--------|
| N                                    | 120    |
| Slope                                | 1.9673 |
| Y-intercept                          | 1.7915 |
| Correlation<br>Coefficient ( $R^2$ ) | 0.9959 |

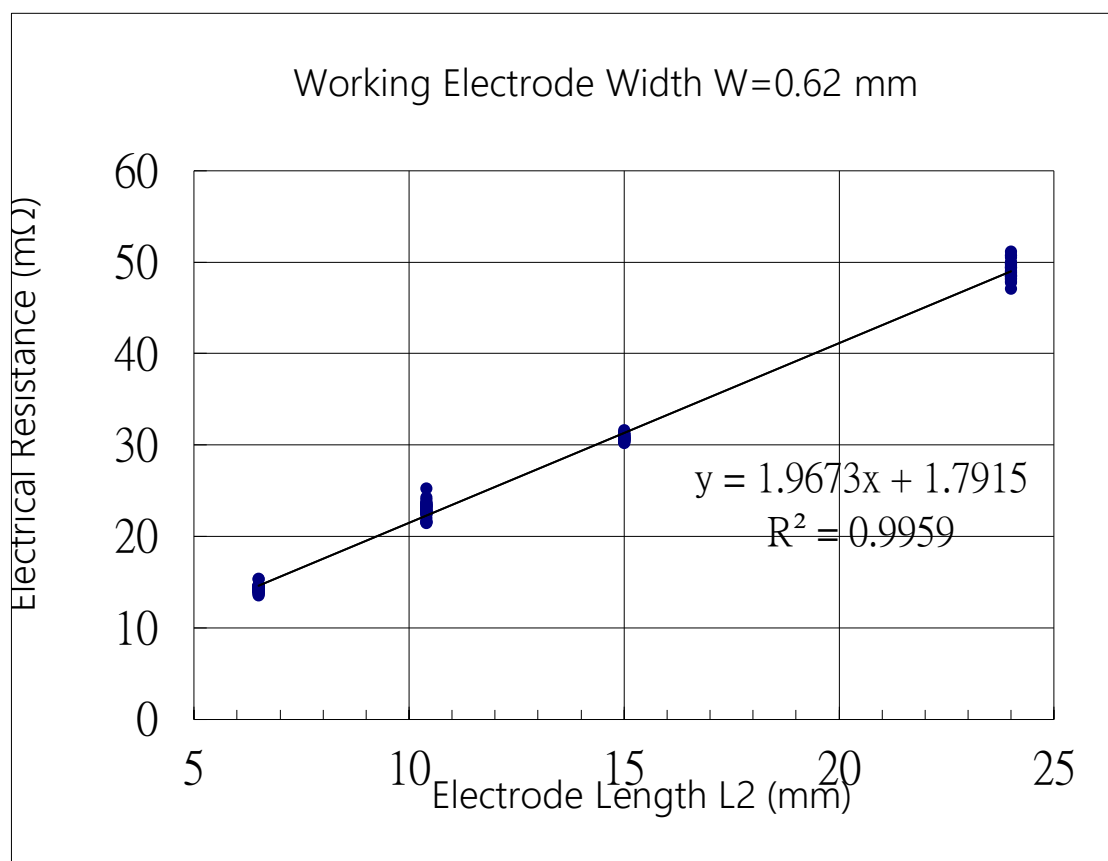

Fig.G2 shows the electrical resistance for different working electrode length when the electrode width W is 0.62mm.

Table F3 shows the electrical resistance for different working electrode length of the 24.65mm, 15.65mm, 11.05mm, 7.15mm, when the electrode width W is 0.426mm. (Unit: :mΩ)

| Test Strip No. | Electrode length L2= 7.15mm | Electrode length L2= 11.05mm | Electrode length L2= 15.65mm | Electrode length L2= 24.65mm |
|----------------|-----------------------------|------------------------------|------------------------------|------------------------------|
| 1              | 16.83                       | 28.25                        | 41.33                        | 66.97                        |
| 2              | 16.81                       | 29.35                        | 40.88                        | 68.4                         |
| 3              | 17.19                       | 28.5                         | 41.01                        | 67.33                        |
| 4              | 16.74                       | 29.8                         | 40.57                        | 66.76                        |
| 5              | 16.53                       | 28.41                        | 40.57                        | 67.74                        |
| 6              | 16.81                       | 28.64                        | 40.47                        | 65.71                        |
| 7              | 16.46                       | 29.47                        | 39.67                        | 66.22                        |
| 8              | 16.87                       | 29.54                        | 39.82                        | 65.42                        |
| 9              | 16.73                       | 27.81                        | 40.02                        | 65.63                        |
| 10             | 16.21                       | 28.78                        | 39.51                        | 66.35                        |

|         |       |       |       |        |
|---------|-------|-------|-------|--------|
| 11      | 16.96 | 28.07 | 41.72 | 67.54  |
| 12      | 16.8  | 29.87 | 40.67 | 65.91  |
| 13      | 16.48 | 28.04 | 40.36 | 67.21  |
| 14      | 16.63 | 27.88 | 40.98 | 65.12  |
| 15      | 16.79 | 29.62 | 40.53 | 66.91  |
| 16      | 16.6  | 27.89 | 40.23 | 65.81  |
| 17      | 16.69 | 28.67 | 39.93 | 64.63  |
| 18      | 16.91 | 28.54 | 39.76 | 66.55  |
| 19      | 16.73 | 27.84 | 40.14 | 65.31  |
| 20      | 16.58 | 29.54 | 39.83 | 65.72  |
| 21      | 16.69 | 27.61 | 40.37 | 64.67  |
| 22      | 16.33 | 29.43 | 40.77 | 65.04  |
| 23      | 16.35 | 29.22 | 39.97 | 66.09  |
| 24      | 16.55 | 29.17 | 40.15 | 64.48  |
| 25      | 16.13 | 27.2  | 40.17 | 66.51  |
| 26      | 16.69 | 28.21 | 40.02 | 65.43  |
| 27      | 16.4  | 28.87 | 39.43 | 65.45  |
| 28      | 16.25 | 29.12 | 39.66 | 66.05  |
| 29      | 16.28 | 27.54 | 39.92 | 64.71  |
| 30      | 16.51 | 27.07 | 39.34 | 65.01  |
| Average | 16.62 | 28.60 | 40.26 | 66.023 |
| STDEV   | 0.25  | 0.80  | 0.57  | 1.01   |
| CV(%)   | 1.48  | 2.79  | 1.41  | 1.53   |

Summarizing the data in Table F3, we can obtain the data shown in Fig.G3.

|                                      |         |
|--------------------------------------|---------|
| N                                    | 120     |
| Slope                                | 2.8006  |
| Y-intercept                          | -1.2641 |
| Correlation<br>Coefficient ( $R^2$ ) | 0.9979  |



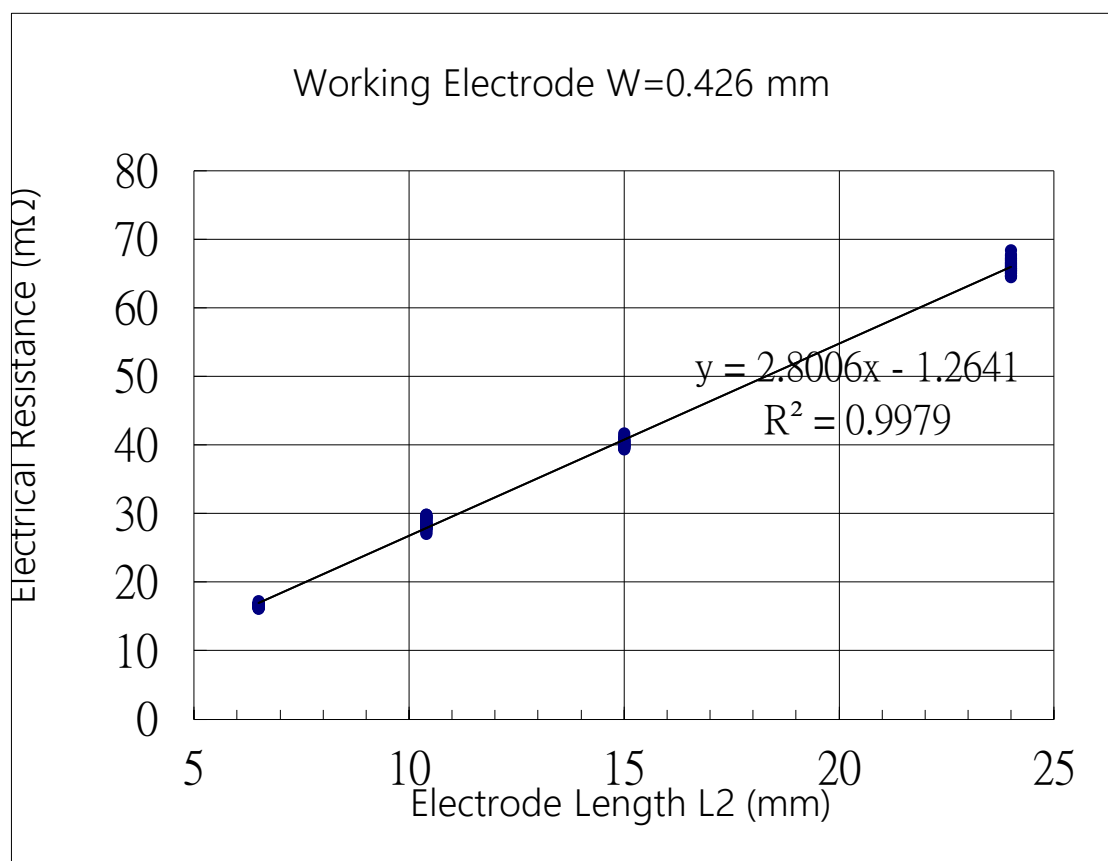

Fig.G3 shows the electrical resistance for different working electrode length when the electrode width W is 0.426mm.

Table F4 shows the electrical resistance for different working electrode length of the 24.65mm, 15.65mm, 11.05mm, 7.15mm, when the electrode width W is 0.206mm. (Unit: :mΩ)

| Test Strip No. | Electrode length L2= 7.15mm | Electrode length L2= 11.05mm | Electrode length L2= 15.65mm | Electrode length L2= 24.65mm |
|----------------|-----------------------------|------------------------------|------------------------------|------------------------------|
| 1              | 25.35                       | 48.51                        | 74.41                        | 123                          |
| 2              | 24.28                       | 48.42                        | 72.7                         | 122.43                       |
| 3              | 24.12                       | 48.41                        | 75.5                         | 124.47                       |
| 4              | 24.28                       | 47.37                        | 73.13                        | 121.45                       |
| 5              | 23.91                       | 47.97                        | 71.04                        | 127.83                       |
| 6              | 24.17                       | 48.65                        | 70.74                        | 119.87                       |
| 7              | 23.63                       | 47.38                        | 70.84                        | 119.38                       |
| 8              | 23.42                       | 46.2                         | 71.3                         | 123.69                       |
| 9              | 23.85                       | 49.36                        | 72.65                        | 121.94                       |
| 10             | 23.91                       | 47.44                        | 69.64                        | 119.87                       |

|         |       |       |       |        |
|---------|-------|-------|-------|--------|
| 11      | 24.7  | 46.83 | 74.69 | 122.23 |
| 12      | 23.86 | 48.27 | 71.38 | 122.98 |
| 13      | 23.87 | 46.69 | 73.34 | 123.15 |
| 14      | 24.48 | 47.75 | 72.21 | 120.81 |
| 15      | 23.9  | 47.54 | 71.07 | 123.11 |
| 16      | 23.59 | 46.75 | 70.15 | 123.1  |
| 17      | 24.1  | 45.62 | 69.98 | 121.96 |
| 18      | 23.83 | 46.76 | 69.65 | 120.4  |
| 19      | 23.97 | 47.09 | 71.54 | 124.67 |
| 20      | 24.26 | 48.59 | 70.94 | 119.23 |
| 21      | 24.59 | 45.55 | 74.12 | 125.43 |
| 22      | 25.81 | 48.44 | 73.88 | 131.45 |
| 23      | 25.59 | 46.87 | 73.49 | 128.15 |
| 24      | 24.94 | 47.1  | 72.16 | 122.2  |
| 25      | 25.41 | 47.65 | 71.1  | 125.12 |
| 26      | 24.08 | 47.44 | 70.88 | 123.22 |
| 27      | 23.94 | 47.13 | 72.25 | 120.36 |
| 28      | 24.18 | 47.65 | 71.87 | 125.21 |
| 29      | 24.28 | 48.38 | 71.52 | 121.11 |
| 30      | 25.13 | 46.3  | 70.47 | 122.21 |
| Average | 24.31 | 47.47 | 71.95 | 123.00 |
| STDEV   | 0.62  | 0.92  | 1.55  | 2.74   |
| CV(%)   | 2.54  | 1.95  | 2.16  | 2.23   |

Summarizing the data in Table F4, we can obtain the data shown in Fig.G4.

|                                      |         |
|--------------------------------------|---------|
| N                                    | 120     |
| Slope                                | 5.613   |
| Y-intercept                          | -11.757 |
| Correlation<br>Coefficient ( $R^2$ ) | 0.9978  |

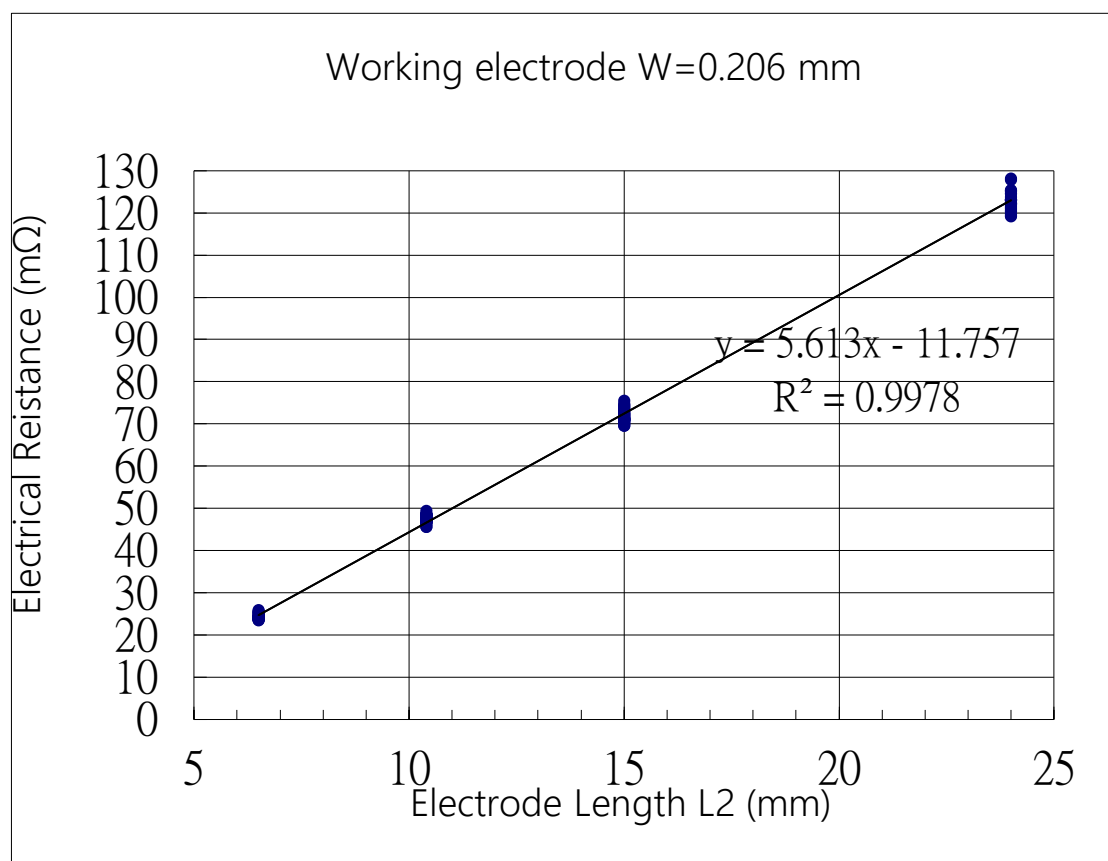

Fig.G4 shows the electrical resistance for different working electrode length when the electrode width W is 0.206mm.

### (5) Fifth Reference Data

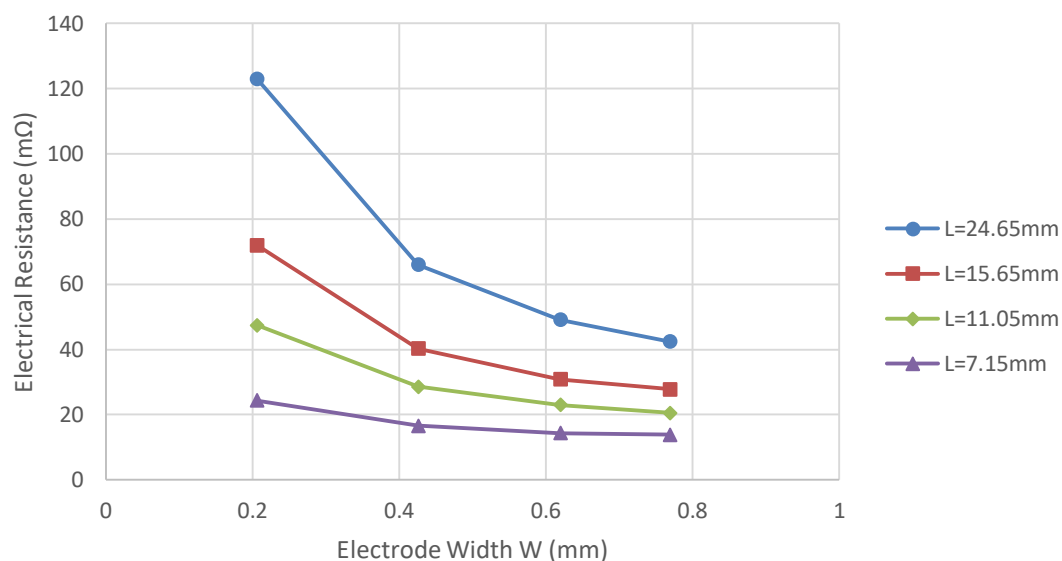

Fig.9 shows the relationship between electrical resistance of the working electrode and electrode width for 4 different electrode lengths.

This Fig.9 in the submitted paper was obtained from the following Tables H1 to H4 and Figures I1 to I4.

Table H1 shows the electrical resistance for different working electrode width of the 0.206mm, 0.426mm, 0.62mm, and 0.77mm, when the electrode length is 24.65mm. (Unit: :mΩ)

| Test Strip No. | Electrode Width W= 0.206mm | Electrode Width W= 0.426mm | Electrode Width W= 0.62mm | Electrode Width W= 0.77mm |
|----------------|----------------------------|----------------------------|---------------------------|---------------------------|
| 1              | 125.43                     | 66.97                      | 48.86                     | 42.16                     |
| 2              | 131.45                     | 68.4                       | 49.65                     | 41.85                     |
| 3              | 128.15                     | 67.33                      | 50.51                     | 42.05                     |
| 4              | 122.2                      | 66.76                      | 49.95                     | 42.5                      |
| 5              | 125.12                     | 67.74                      | 49.32                     | 41.12                     |
| 6              | 123.22                     | 65.71                      | 48.43                     | 42.76                     |
| 7              | 120.36                     | 66.22                      | 48.41                     | 41.7                      |
| 8              | 125.21                     | 65.42                      | 48.47                     | 41.16                     |
| 9              | 121.11                     | 65.63                      | 47.85                     | 42.04                     |
| 10             | 122.21                     | 66.35                      | 48.23                     | 42.7                      |
| 11             | 123                        | 67.54                      | 50                        | 42.78                     |
| 12             | 122.43                     | 65.91                      | 49.81                     | 42.93                     |
| 13             | 124.47                     | 67.21                      | 49.44                     | 43.11                     |
| 14             | 121.45                     | 65.12                      | 51.17                     | 41.3                      |
| 15             | 127.83                     | 66.91                      | 50.74                     | 42.24                     |
| 16             | 119.87                     | 65.81                      | 48.11                     | 43.5                      |
| 17             | 119.38                     | 64.63                      | 49                        | 43.4                      |
| 18             | 123.69                     | 66.55                      | 49.09                     | 43.34                     |

|         |        |       |       |       |
|---------|--------|-------|-------|-------|
| 19      | 121.94 | 65.31 | 48.69 | 41.79 |
| 20      | 119.87 | 65.72 | 48.82 | 41.98 |
| 21      | 122.23 | 64.67 | 48.49 | 43.47 |
| 22      | 122.98 | 65.04 | 50.77 | 42.78 |
| 23      | 123.15 | 66.09 | 49.48 | 42.05 |
| 24      | 120.81 | 64.48 | 49.42 | 41.15 |
| 25      | 123.11 | 66.51 | 49.84 | 42.23 |
| 26      | 123.1  | 65.43 | 48.56 | 42.35 |
| 27      | 121.96 | 65.45 | 48.23 | 42.89 |
| 28      | 120.4  | 66.05 | 48.56 | 43.03 |
| 29      | 124.67 | 64.71 | 47.77 | 42.05 |
| 30      | 119.23 | 65.01 | 47.07 | 42.8  |
| Average | 123.00 | 66.02 | 49.09 | 42.37 |
| STDEV   | 2.74   | 1.01  | 0.98  | 0.70  |
| CV(%)   | 2.23   | 1.53  | 1.99  | 1.65  |

Summarizing the data in Table H1, we can obtain the data shown in Fig.I1.

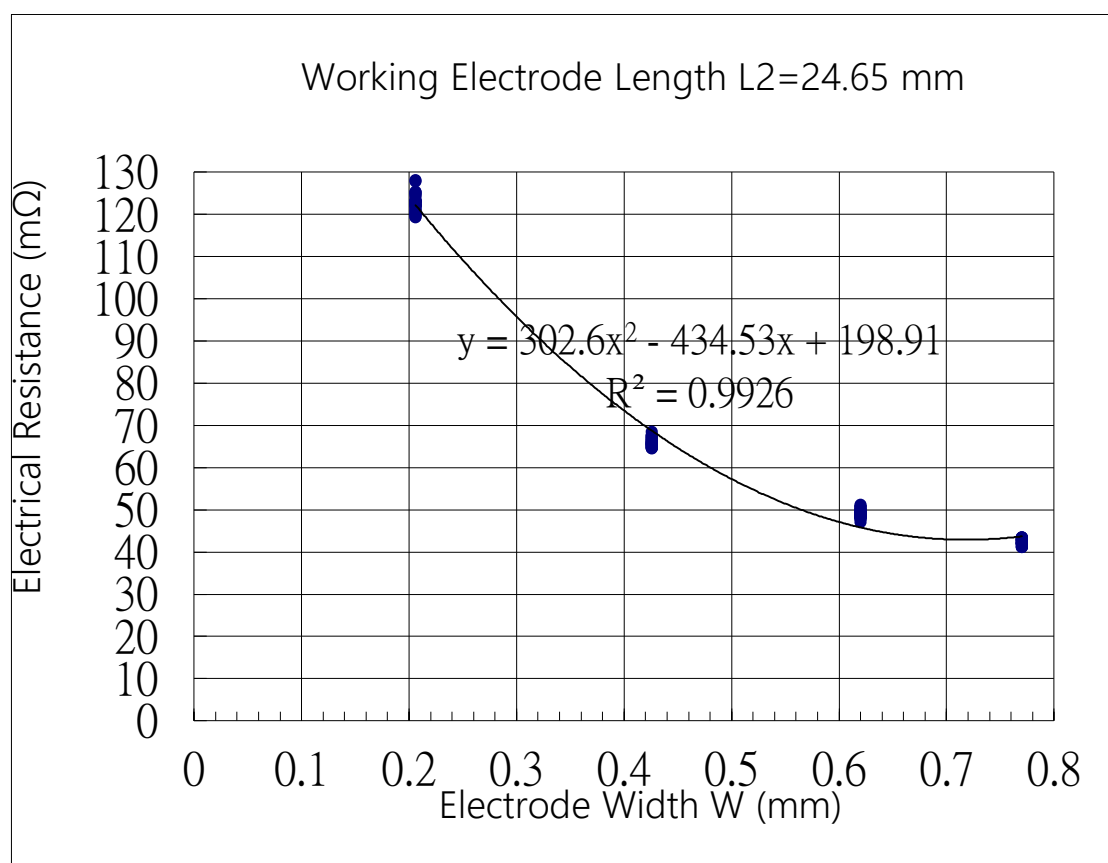

Fig.I1 shows the electrical resistance for different working electrode width when the electrode length is 24.65mm.

Table H2 shows the electrical resistance for different working electrode width of the 0.206mm, 0.426mm, 0.62mm, and 0.77mm, when the electrode length is 15.65mm. (Unit: :mΩ)

| Test Strip | Electrode | Electrode | Electrode | Electrode |
|------------|-----------|-----------|-----------|-----------|
|------------|-----------|-----------|-----------|-----------|

| No.     | Width W=<br>0.206mm | Width W=<br>0.426mm | Width W=<br>0.62mm | Width W=<br>0.77mm |
|---------|---------------------|---------------------|--------------------|--------------------|
| 1       | 74.41               | 41.33               | 30.57              | 29                 |
| 2       | 72.7                | 40.88               | 30.72              | 27.81              |
| 3       | 75.5                | 41.01               | 30.67              | 27.92              |
| 4       | 73.13               | 40.57               | 31.12              | 28.73              |
| 5       | 71.04               | 40.57               | 30.55              | 30.53              |
| 6       | 70.74               | 40.47               | 31.32              | 29.58              |
| 7       | 70.84               | 39.67               | 30.92              | 29.47              |
| 8       | 71.3                | 39.82               | 30.89              | 30.9               |
| 9       | 72.65               | 40.02               | 30.61              | 30.63              |
| 10      | 69.64               | 39.51               | 30.42              | 29.61              |
| 11      | 74.69               | 41.72               | 30.88              | 27.31              |
| 12      | 71.38               | 40.67               | 30.89              | 27.37              |
| 13      | 73.34               | 40.36               | 30.95              | 27.28              |
| 14      | 72.21               | 40.98               | 31.13              | 27.26              |
| 15      | 71.07               | 40.53               | 31.18              | 26.89              |
| 16      | 70.15               | 40.23               | 31.14              | 27.63              |
| 17      | 69.98               | 39.93               | 31.4               | 27.24              |
| 18      | 69.65               | 39.76               | 30.75              | 26.51              |
| 19      | 71.54               | 40.14               | 31.61              | 26.66              |
| 20      | 70.94               | 39.83               | 31.11              | 27.71              |
| 21      | 74.12               | 40.37               | 30.3               | 27.19              |
| 22      | 73.88               | 40.77               | 30.25              | 26.5               |
| 23      | 73.49               | 39.97               | 30.62              | 26.93              |
| 24      | 72.16               | 40.15               | 30.49              | 26.95              |
| 25      | 71.1                | 40.17               | 30.38              | 27.21              |
| 26      | 70.88               | 40.02               | 30.55              | 26.59              |
| 27      | 72.25               | 39.43               | 30.78              | 26.84              |
| 28      | 71.87               | 39.66               | 30.46              | 27.01              |
| 29      | 71.52               | 39.92               | 30.76              | 26.44              |
| 30      | 70.47               | 39.34               | 30.77              | 26.7               |
| Average | 71.96               | 40.26               | 30.81              | 27.81              |
| STDEV   | 1.55                | 0.57                | 0.34               | 1.34               |
| CV(%)   | 2.16                | 1.41                | 1.09               | 4.80               |

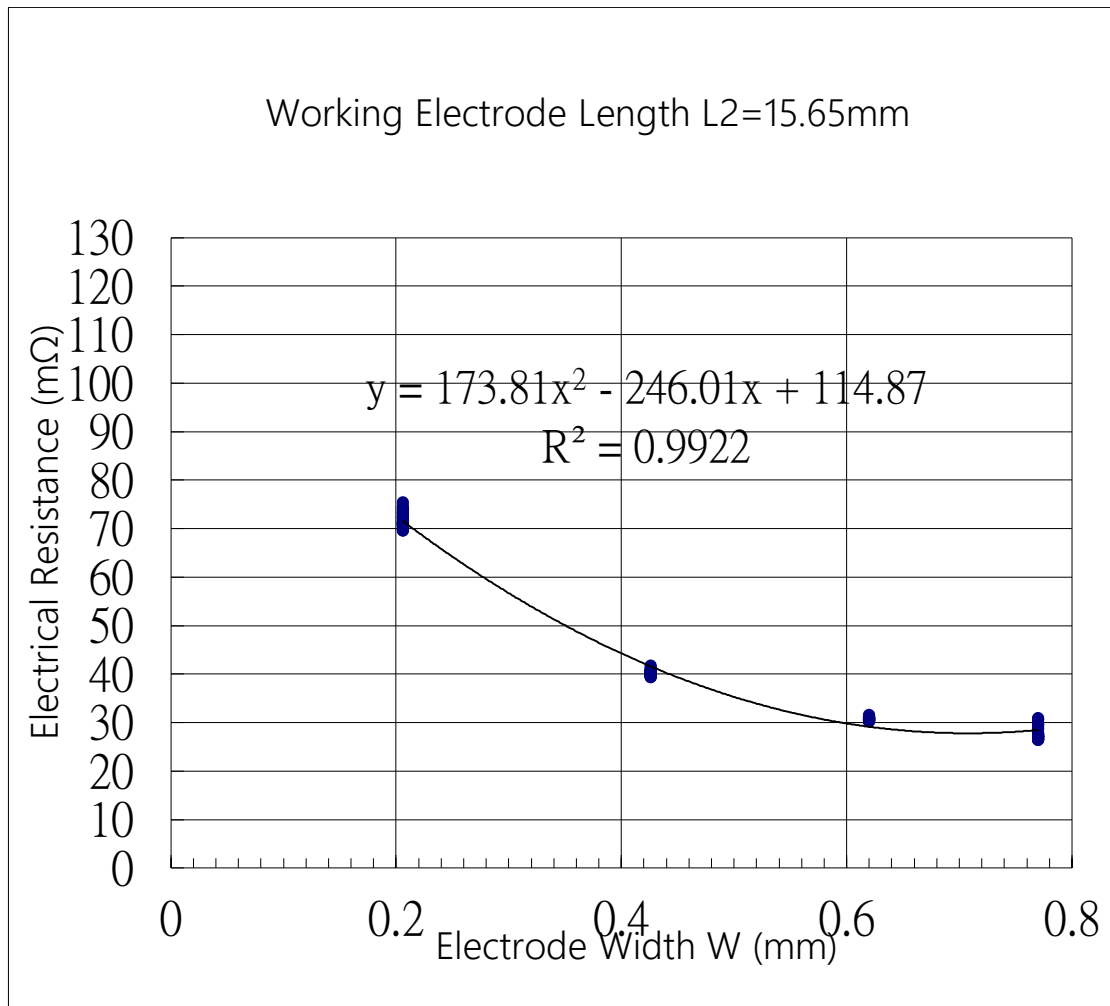

Fig.12 shows the electrical resistance for different working electrode width when the electrode length is 15.65mm.

Table H3 shows the electrical resistance for different working electrode width of the 0.206mm, 0.426mm, 0.62mm, and 0.77mm, when the electrode length is 11.05mm. (Unit: :mΩ)

| Test Strip No. | Electrode Width W= 0.206mm | Electrode Width W= 0.426mm | Electrode Width W= 0.62mm | Electrode Width W= 0.77mm |
|----------------|----------------------------|----------------------------|---------------------------|---------------------------|
| 1              | 48.51                      | 28.25                      | 23.58                     | 20.72                     |
| 2              | 48.42                      | 29.35                      | 23.36                     | 20.09                     |
| 3              | 48.41                      | 28.5                       | 22.85                     | 19.61                     |
| 4              | 47.37                      | 29.8                       | 22.42                     | 19.61                     |
| 5              | 47.97                      | 28.41                      | 22.75                     | 18.87                     |
| 6              | 48.65                      | 28.64                      | 23.54                     | 20.86                     |
| 7              | 47.38                      | 29.47                      | 22.01                     | 20.72                     |
| 8              | 46.2                       | 29.54                      | 24.26                     | 20.82                     |
| 9              | 49.36                      | 27.81                      | 24                        | 20.72                     |
| 10             | 47.44                      | 28.78                      | 23.71                     | 20.33                     |

|         |       |       |       |       |
|---------|-------|-------|-------|-------|
| 11      | 46.83 | 28.07 | 22.95 | 20.92 |
| 12      | 48.27 | 29.87 | 22.73 | 20.25 |
| 13      | 46.69 | 28.04 | 23.38 | 21.28 |
| 14      | 47.75 | 27.88 | 23.27 | 20.35 |
| 15      | 47.54 | 29.62 | 25.24 | 20.1  |
| 16      | 46.75 | 27.89 | 23.63 | 20.25 |
| 17      | 45.62 | 28.67 | 23.14 | 19.71 |
| 18      | 46.76 | 28.54 | 22.5  | 20.1  |
| 19      | 47.09 | 27.84 | 22.48 | 21.05 |
| 20      | 48.59 | 29.54 | 23.38 | 20.27 |
| 21      | 45.55 | 27.61 | 23.05 | 21.09 |
| 22      | 48.44 | 29.43 | 22.68 | 20.75 |
| 23      | 46.87 | 29.22 | 22.59 | 21.81 |
| 24      | 47.1  | 29.17 | 22.91 | 20.87 |
| 25      | 47.65 | 27.2  | 23.32 | 20.57 |
| 26      | 47.44 | 28.21 | 21.53 | 21.88 |
| 27      | 47.13 | 28.87 | 22.68 | 20.63 |
| 28      | 47.65 | 29.12 | 21.46 | 20.77 |
| 29      | 48.38 | 27.54 | 21.63 | 20.54 |
| 30      | 46.3  | 27.07 | 21.65 | 21.35 |
| Average | 47.47 | 28.60 | 22.96 | 20.56 |
| STDEV   | 0.92  | 0.80  | 0.84  | 0.64  |
| CV(%)   | 1.95  | 2.79  | 3.64  | 3.12  |



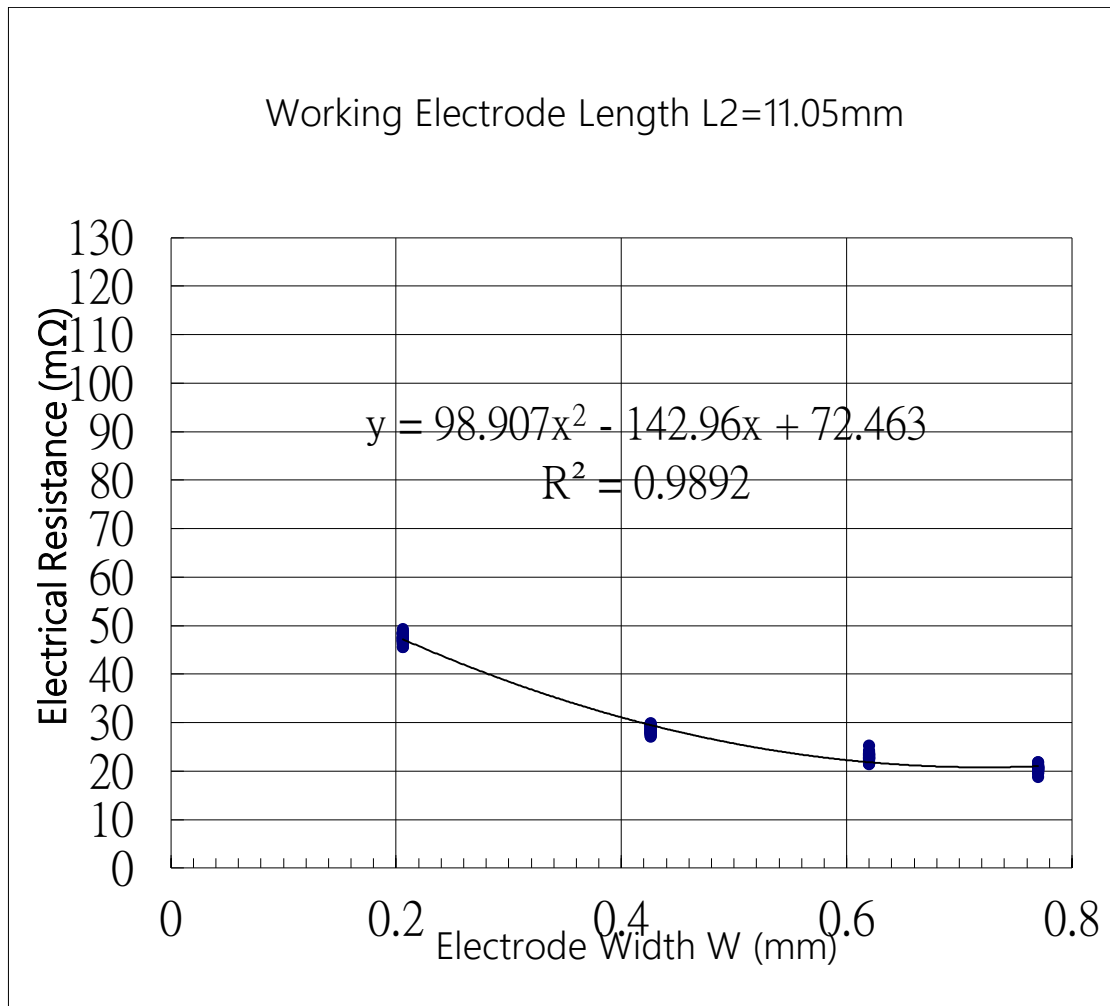

Fig.I3 shows the electrical resistance for different working electrode width when the electrode length is 11.05mm.

Table H4 shows the electrical resistance for different working electrode width of the 0.206mm, 0.426mm, 0.62mm, and 0.77mm, when the electrode length is 7.15mm. (Unit: :mΩ)

| Test Strip No. | Electrode Width W= 0.206mm | Electrode Width W= 0.426mm | Electrode Width W= 0.62mm | Electrode Width W= 0.77mm |
|----------------|----------------------------|----------------------------|---------------------------|---------------------------|
| 1              | 25.35                      | 16.83                      | 15.3                      | 15.51                     |
| 2              | 24.28                      | 16.81                      | 14.71                     | 14.32                     |
| 3              | 24.12                      | 17.19                      | 14.63                     | 15.03                     |
| 4              | 24.28                      | 16.74                      | 14.59                     | 14.86                     |
| 5              | 23.91                      | 16.53                      | 15.41                     | 15.03                     |
| 6              | 24.17                      | 16.81                      | 14.45                     | 15.28                     |
| 7              | 23.63                      | 16.46                      | 14.4                      | 15.11                     |
| 8              | 23.42                      | 16.87                      | 14.65                     | 14.68                     |
| 9              | 23.85                      | 16.73                      | 13.76                     | 15.51                     |
| 10             | 23.91                      | 16.21                      | 14.36                     | 14.46                     |
| 11             | 24.7                       | 16.96                      | 14.44                     | 13.35                     |
| 12             | 23.86                      | 16.8                       | 14.62                     | 13.62                     |
| 13             | 23.87                      | 16.48                      | 14.58                     | 13.52                     |

|         |       |       |       |       |
|---------|-------|-------|-------|-------|
| 14      | 24.48 | 16.63 | 14.13 | 13.42 |
| 15      | 23.9  | 16.79 | 13.91 | 13.95 |
| 16      | 23.59 | 16.6  | 14.26 | 13.96 |
| 17      | 24.1  | 16.69 | 14.15 | 13.07 |
| 18      | 23.83 | 16.91 | 14.07 | 13.14 |
| 19      | 23.97 | 16.73 | 13.97 | 13.22 |
| 20      | 24.26 | 16.58 | 14.02 | 13.23 |
| 21      | 24.59 | 16.69 | 14.16 | 13.18 |
| 22      | 25.81 | 16.33 | 13.73 | 13.15 |
| 23      | 25.59 | 16.35 | 14.08 | 13.49 |
| 24      | 24.94 | 16.55 | 14.1  | 13.14 |
| 25      | 25.41 | 16.13 | 14.03 | 13.38 |
| 26      | 24.08 | 16.69 | 14.23 | 13.16 |
| 27      | 23.94 | 16.4  | 14.15 | 13.31 |
| 28      | 24.18 | 16.25 | 13.9  | 13.48 |
| 29      | 24.28 | 16.28 | 14.25 | 13.08 |
| 30      | 25.13 | 16.51 | 13.56 | 12.92 |
| Average | 24.31 | 16.62 | 14.29 | 13.89 |
| STDEV   | 0.62  | 0.25  | 0.41  | 0.85  |
| CV(%)   | 2.54  | 1.48  | 2.89  | 6.11  |

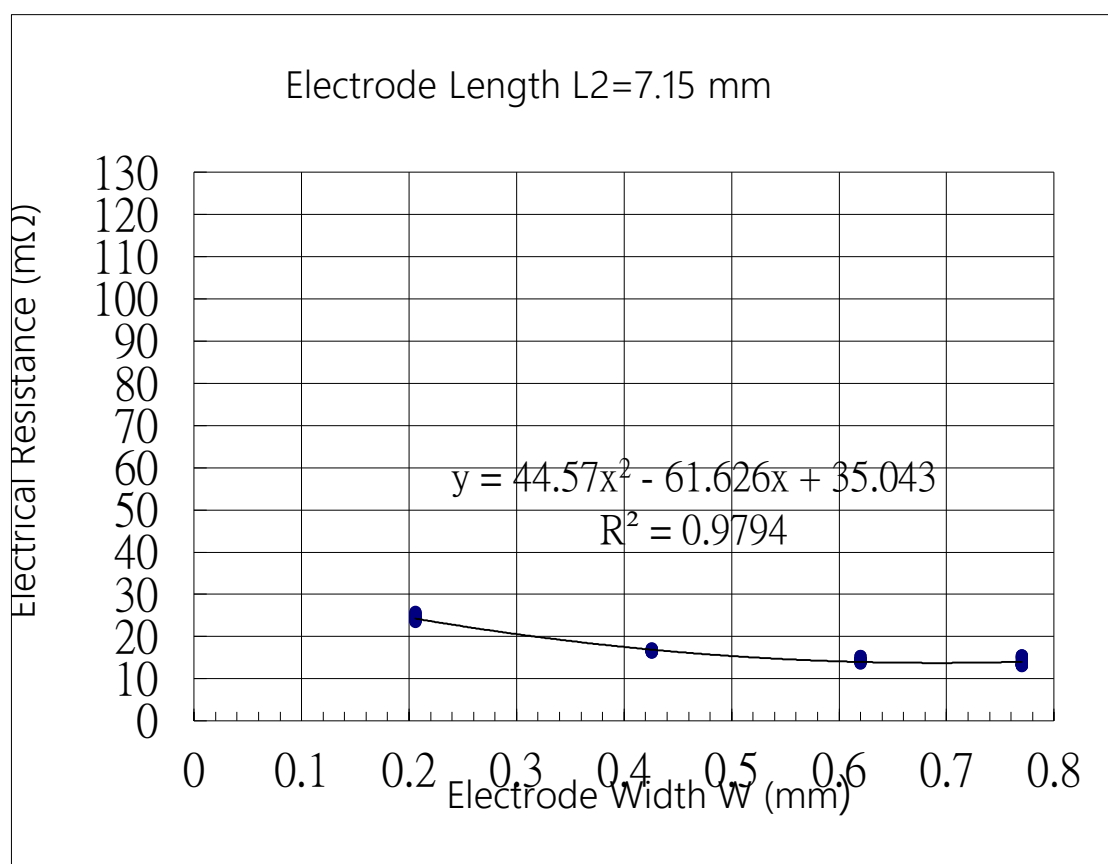

Fig.14 shows the electrical resistance for different working electrode width when the electrode length is 7.15mm.

## (6) Sixth Reference Data

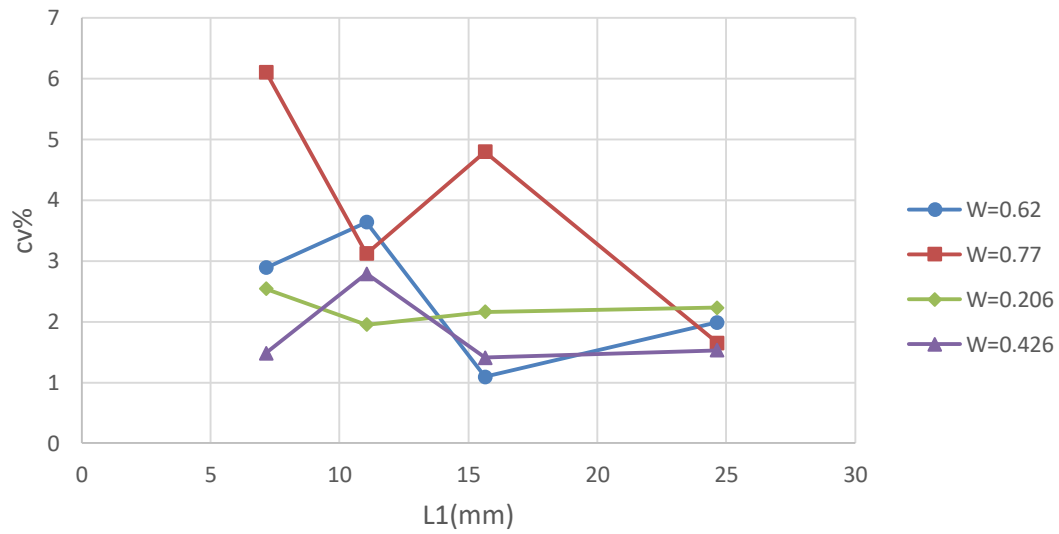

Fig.10 CV in electrical resistance against working electrode length for different working electrode width.

This Fig.10 in the submitted paper was obtained from the following Tables J1 which is the summary of Table H1 to H4.

Table J1 CV on electrical resistance for reference electrodes with various length and width. (Unit: %).

|                | L1=<br>7.15mm | L1=<br>11.05mm | L1=<br>15.65mm | L1=<br>24.65mm |
|----------------|---------------|----------------|----------------|----------------|
| CV (W=0.206mm) | 2.54          | 1.95           | 2.16           | 2.23           |
| CV (W=0.426mm) | 1.48          | 2.79           | 1.41           | 1.53           |
| CV (W=0.62mm)  | 2.89          | 3.64           | 1.09           | 1.97           |
| CV (W=0.77mm)  | 6.11          | 3.12           | 4.80           | 1.65           |

**(7) Seventh Reference Data**

Table 3 Control solution test results from 3 lots of test strips with same electrode length but different electrode width W. (Unit: mg/dL).

|                                               |                    |      |       |       |       |       |       |
|-----------------------------------------------|--------------------|------|-------|-------|-------|-------|-------|
| Length= 24 &<br>24.65mm;<br>Width=<br>0.206mm | Average            | 73.8 | 184.1 | 232   | 325.6 | 410.1 | 551   |
|                                               | Standard Deviation | 1.90 | 7.11  | 5.36  | 11.06 | 7.94  | 12.69 |
|                                               | CV (%)             | 2.58 | 3.86  | 2.31  | 3.40  | 1.94  | 2.30  |
|                                               | YSI                | 74   | 185   | 233   | 326   | 411   | 548   |
| Length= 24 &<br>24.65mm;<br>Width=<br>0.77mm  | Average            | 75.6 | 191.4 | 239.2 | 333.0 | 420.3 | 565.5 |
|                                               | Standard Deviation | 1.74 | 7.29  | 5.49  | 10.36 | 6.93  | 13.21 |
|                                               | CV (%)             | 2.30 | 3.81  | 2.30  | 3.11  | 1.65  | 2.34  |
|                                               | YSI                | 74   | 185   | 233   | 326   | 411   | 548   |

This Table 3 in the submitted paper was obtained from the following Tables K1 and K2.

Table K1 Control solution test results for reference electrode length of 24mm and working electrode length of 24.65mm. W=0.206mm. (Unit: mg/dL)

| Lot No. | No. | Control solution test results |     |     |     |     |     |
|---------|-----|-------------------------------|-----|-----|-----|-----|-----|
| 1       | 1   | 71                            | 178 | 223 | 308 | 406 | 554 |
| 1       | 2   | 77                            | 196 | 237 | 311 | 397 | 572 |
| 1       | 3   | 75                            | 185 | 237 | 328 | 414 | 533 |
| 1       | 4   | 75                            | 182 | 229 | 323 | 409 | 533 |
| 1       | 5   | 76                            | 194 | 229 | 312 | 410 | 566 |
| 1       | 6   | 74                            | 180 | 223 | 320 | 419 | 561 |
| 1       | 7   | 71                            | 183 | 224 | 326 | 398 | 545 |
| 1       | 8   | 77                            | 184 | 241 | 337 | 417 | 561 |
| 1       | 9   | 75                            | 191 | 234 | 320 | 405 | 529 |
| 1       | 10  | 75                            | 189 | 233 | 342 | 416 | 550 |
| 1       | 11  | 71                            | 187 | 240 | 310 | 416 | 556 |
| 1       | 12  | 71                            | 174 | 226 | 344 | 407 | 550 |
| 1       | 13  | 72                            | 173 | 239 | 336 | 411 | 554 |
| 1       | 14  | 73                            | 188 | 235 | 311 | 407 | 554 |
| 1       | 15  | 73                            | 191 | 233 | 334 | 406 | 532 |
| 1       | 16  | 77                            | 175 | 241 | 343 | 400 | 528 |
| 1       | 17  | 73                            | 173 | 231 | 318 | 421 | 550 |
| 1       | 18  | 75                            | 174 | 225 | 323 | 402 | 552 |

|   |    |    |     |     |     |     |     |
|---|----|----|-----|-----|-----|-----|-----|
| 1 | 19 | 73 | 188 | 241 | 324 | 424 | 542 |
| 1 | 20 | 75 | 176 | 230 | 334 | 407 | 544 |
| 1 | 21 | 77 | 187 | 226 | 336 | 407 | 568 |
| 1 | 22 | 71 | 187 | 229 | 317 | 401 | 561 |
| 1 | 23 | 74 | 189 | 232 | 336 | 411 | 545 |
| 1 | 24 | 72 | 183 | 231 | 339 | 405 | 529 |
| 1 | 25 | 76 | 188 | 223 | 338 | 397 | 567 |
| 2 | 1  | 72 | 173 | 239 | 327 | 418 | 560 |
| 2 | 2  | 74 | 179 | 231 | 314 | 402 | 549 |
| 2 | 3  | 77 | 182 | 235 | 315 | 418 | 575 |
| 2 | 4  | 77 | 173 | 234 | 315 | 411 | 541 |
| 2 | 5  | 74 | 179 | 230 | 319 | 404 | 544 |
| 2 | 6  | 71 | 174 | 233 | 330 | 420 | 572 |
| 2 | 7  | 73 | 177 | 233 | 339 | 417 | 538 |
| 2 | 8  | 76 | 191 | 229 | 325 | 420 | 567 |
| 2 | 9  | 74 | 192 | 234 | 328 | 420 | 538 |
| 2 | 10 | 71 | 176 | 232 | 319 | 400 | 554 |
| 2 | 11 | 74 | 195 | 234 | 310 | 406 | 540 |
| 2 | 12 | 74 | 175 | 228 | 320 | 420 | 544 |
| 2 | 13 | 75 | 196 | 225 | 329 | 404 | 567 |
| 2 | 14 | 73 | 178 | 232 | 331 | 408 | 537 |
| 2 | 15 | 71 | 186 | 235 | 318 | 412 | 540 |
| 2 | 16 | 71 | 183 | 238 | 322 | 424 | 539 |
| 2 | 17 | 71 | 182 | 241 | 341 | 403 | 529 |
| 2 | 18 | 71 | 180 | 232 | 327 | 406 | 548 |
| 2 | 19 | 77 | 177 | 238 | 342 | 421 | 548 |
| 2 | 20 | 74 | 181 | 227 | 320 | 419 | 552 |
| 2 | 21 | 76 | 194 | 224 | 310 | 423 | 570 |
| 2 | 22 | 74 | 183 | 235 | 320 | 400 | 549 |
| 2 | 23 | 72 | 196 | 227 | 341 | 401 | 557 |
| 2 | 24 | 75 | 174 | 239 | 333 | 399 | 546 |
| 2 | 25 | 73 | 191 | 236 | 336 | 412 | 539 |
| 3 | 1  | 71 | 176 | 226 | 316 | 403 | 557 |
| 3 | 2  | 75 | 177 | 234 | 338 | 412 | 563 |
| 3 | 3  | 72 | 191 | 225 | 341 | 405 | 545 |
| 3 | 4  | 75 | 194 | 231 | 324 | 410 | 544 |
| 3 | 5  | 72 | 196 | 231 | 340 | 397 | 546 |

|   |                    |      |       |      |       |       |       |
|---|--------------------|------|-------|------|-------|-------|-------|
| 3 | 6                  | 76   | 184   | 231  | 310   | 422   | 532   |
| 3 | 7                  | 74   | 197   | 239  | 329   | 404   | 565   |
| 3 | 8                  | 77   | 190   | 224  | 311   | 399   | 564   |
| 3 | 9                  | 73   | 188   | 235  | 326   | 413   | 571   |
| 3 | 10                 | 72   | 182   | 229  | 341   | 423   | 557   |
| 3 | 11                 | 73   | 180   | 223  | 328   | 420   | 573   |
| 3 | 12                 | 74   | 188   | 234  | 344   | 410   | 556   |
| 3 | 13                 | 75   | 194   | 224  | 330   | 420   | 534   |
| 3 | 14                 | 75   | 183   | 229  | 311   | 398   | 563   |
| 3 | 15                 | 76   | 184   | 235  | 310   | 413   | 568   |
| 3 | 16                 | 76   | 175   | 235  | 330   | 414   | 554   |
| 3 | 17                 | 75   | 186   | 232  | 316   | 405   | 558   |
| 3 | 18                 | 72   | 186   | 236  | 312   | 417   | 547   |
| 3 | 19                 | 73   | 188   | 234  | 324   | 416   | 567   |
| 3 | 20                 | 74   | 195   | 223  | 343   | 412   | 542   |
| 3 | 21                 | 75   | 178   | 241  | 323   | 408   | 529   |
| 3 | 22                 | 73   | 189   | 233  | 313   | 424   | 564   |
| 3 | 23                 | 72   | 189   | 226  | 314   | 408   | 556   |
| 3 | 24                 | 74   | 176   | 234  | 309   | 404   | 552   |
| 3 | 25                 | 73   | 182   | 243  | 339   | 402   | 544   |
|   | Average            | 73.8 | 184.1 | 232  | 325.6 | 410.1 | 551   |
|   | Standard Deviation | 1.90 | 7.11  | 5.36 | 11.06 | 7.94  | 12.69 |
|   | CV (%)             | 2.58 | 3.86  | 2.31 | 3.40  | 1.94  | 2.30  |
|   | YSI                | 74   | 185   | 233  | 326   | 411   | 548   |

Table K2 Control solution test results for reference electrode length of 24mm and working electrode length of 24.65mm. W=0.77mm. (Unit: mg/dL)

| Lot No. | No. | Control solution test results |     |     |     |     |     |
|---------|-----|-------------------------------|-----|-----|-----|-----|-----|
| 1       | 1   | 76                            | 200 | 233 | 320 | 412 | 543 |
| 1       | 2   | 75                            | 186 | 233 | 334 | 426 | 543 |
| 1       | 3   | 78                            | 187 | 247 | 336 | 422 | 580 |
| 1       | 4   | 78                            | 200 | 237 | 343 | 432 | 565 |
| 1       | 5   | 74                            | 181 | 236 | 332 | 422 | 543 |
| 1       | 6   | 76                            | 199 | 242 | 323 | 415 | 571 |
| 1       | 7   | 75                            | 196 | 236 | 327 | 423 | 563 |

|   |    |    |     |     |     |     |     |
|---|----|----|-----|-----|-----|-----|-----|
| 1 | 8  | 76 | 192 | 235 | 327 | 421 | 565 |
| 1 | 9  | 76 | 183 | 243 | 343 | 426 | 560 |
| 1 | 10 | 73 | 196 | 248 | 318 | 423 | 576 |
| 1 | 11 | 77 | 196 | 233 | 321 | 419 | 551 |
| 1 | 12 | 75 | 200 | 243 | 339 | 415 | 547 |
| 1 | 13 | 78 | 195 | 239 | 337 | 412 | 550 |
| 1 | 14 | 76 | 178 | 247 | 318 | 431 | 557 |
| 1 | 15 | 75 | 181 | 242 | 323 | 412 | 549 |
| 1 | 16 | 78 | 180 | 246 | 334 | 425 | 586 |
| 1 | 17 | 73 | 201 | 236 | 328 | 429 | 581 |
| 1 | 18 | 73 | 181 | 244 | 342 | 415 | 567 |
| 1 | 19 | 78 | 194 | 232 | 351 | 423 | 584 |
| 1 | 20 | 77 | 194 | 237 | 334 | 422 | 557 |
| 1 | 21 | 75 | 199 | 232 | 339 | 412 | 567 |
| 1 | 22 | 75 | 181 | 237 | 334 | 423 | 551 |
| 1 | 23 | 75 | 196 | 247 | 326 | 416 | 548 |
| 1 | 24 | 78 | 180 | 246 | 346 | 431 | 560 |
| 1 | 25 | 74 | 183 | 239 | 327 | 432 | 584 |
| 2 | 1  | 74 | 194 | 236 | 323 | 410 | 577 |
| 2 | 2  | 73 | 180 | 235 | 341 | 414 | 580 |
| 2 | 3  | 78 | 180 | 238 | 319 | 419 | 554 |
| 2 | 4  | 76 | 188 | 241 | 325 | 421 | 559 |
| 2 | 5  | 77 | 187 | 244 | 350 | 427 | 572 |
| 2 | 6  | 76 | 196 | 238 | 320 | 427 | 585 |
| 2 | 7  | 73 | 199 | 232 | 345 | 432 | 545 |
| 2 | 8  | 74 | 193 | 248 | 336 | 421 | 555 |
| 2 | 9  | 78 | 192 | 248 | 324 | 432 | 547 |
| 2 | 10 | 77 | 199 | 245 | 318 | 422 | 564 |
| 2 | 11 | 76 | 183 | 236 | 329 | 428 | 585 |
| 2 | 12 | 78 | 198 | 236 | 351 | 413 | 585 |
| 2 | 13 | 74 | 194 | 243 | 330 | 429 | 586 |
| 2 | 14 | 76 | 189 | 245 | 337 | 409 | 573 |
| 2 | 15 | 76 | 180 | 242 | 343 | 418 | 547 |
| 2 | 16 | 77 | 193 | 234 | 334 | 415 | 551 |
| 2 | 17 | 78 | 178 | 230 | 345 | 419 | 579 |
| 2 | 18 | 74 | 185 | 242 | 332 | 412 | 562 |
| 2 | 19 | 74 | 178 | 240 | 339 | 420 | 562 |

|   |                    |      |       |       |       |       |       |
|---|--------------------|------|-------|-------|-------|-------|-------|
| 2 | 20                 | 75   | 188   | 236   | 320   | 420   | 568   |
| 2 | 21                 | 73   | 201   | 247   | 336   | 431   | 571   |
| 2 | 22                 | 74   | 182   | 233   | 322   | 424   | 583   |
| 2 | 23                 | 74   | 191   | 232   | 339   | 427   | 558   |
| 2 | 24                 | 78   | 200   | 246   | 347   | 411   | 572   |
| 2 | 25                 | 74   | 196   | 233   | 338   | 420   | 572   |
| 3 | 1                  | 75   | 190   | 247   | 319   | 416   | 543   |
| 3 | 2                  | 73   | 193   | 241   | 336   | 424   | 572   |
| 3 | 3                  | 78   | 201   | 243   | 350   | 414   | 560   |
| 3 | 4                  | 73   | 191   | 243   | 325   | 415   | 574   |
| 3 | 5                  | 78   | 197   | 232   | 342   | 415   | 560   |
| 3 | 6                  | 78   | 199   | 247   | 339   | 417   | 568   |
| 3 | 7                  | 76   | 187   | 246   | 322   | 422   | 559   |
| 3 | 8                  | 77   | 194   | 230   | 334   | 409   | 579   |
| 3 | 9                  | 73   | 198   | 234   | 337   | 415   | 581   |
| 3 | 10                 | 73   | 200   | 247   | 347   | 431   | 550   |
| 3 | 11                 | 76   | 200   | 243   | 317   | 421   | 558   |
| 3 | 12                 | 76   | 194   | 234   | 326   | 426   | 549   |
| 3 | 13                 | 77   | 193   | 231   | 351   | 411   | 557   |
| 3 | 14                 | 75   | 190   | 239   | 333   | 422   | 578   |
| 3 | 15                 | 78   | 192   | 234   | 324   | 427   | 563   |
| 3 | 16                 | 76   | 201   | 233   | 346   | 420   | 548   |
| 3 | 17                 | 77   | 188   | 241   | 346   | 412   | 583   |
| 3 | 18                 | 75   | 187   | 242   | 323   | 410   | 585   |
| 3 | 19                 | 76   | 185   | 241   | 321   | 409   | 573   |
| 3 | 20                 | 74   | 199   | 233   | 350   | 431   | 561   |
| 3 | 21                 | 74   | 182   | 237   | 338   | 421   | 581   |
| 3 | 22                 | 78   | 201   | 237   | 324   | 411   | 575   |
| 3 | 23                 | 74   | 197   | 238   | 318   | 432   | 566   |
| 3 | 24                 | 73   | 201   | 247   | 317   | 418   | 574   |
| 3 | 25                 | 77   | 191   | 231   | 347   | 413   | 579   |
|   | Average            | 75.6 | 191.4 | 239.2 | 333.0 | 420.3 | 565.5 |
|   | Standard Deviation | 1.74 | 7.29  | 5.49  | 10.36 | 6.93  | 13.21 |
|   | CV (%)             | 2.30 | 3.81  | 2.30  | 3.11  | 1.65  | 2.34  |
|   | YSI                | 74   | 185   | 233   | 326   | 411   | 548   |



### (8) The Eight Reference Data

Table 4 Control solution test results from 3 lots of test strips for different electrode length but same electrode width. (Unit: mg/dL).

|                                               |                    |      |       |       |       |       |       |
|-----------------------------------------------|--------------------|------|-------|-------|-------|-------|-------|
| Length= 6.5 &<br>7.15mm;<br>Width=<br>0.206mm | Average            | 76.1 | 191.2 | 240.2 | 335.9 | 423.8 | 572.8 |
|                                               | Standard Deviation | 2.12 | 5.82  | 5.12  | 10.24 | 6.74  | 11.29 |
|                                               | CV (%)             | 2.79 | 3.05  | 2.13  | 3.05  | 1.59  | 1.97  |
|                                               | YSI                | 74   | 185   | 233   | 326   | 411   | 548   |
| Length= 24 &<br>24.65mm;<br>Width=<br>0.206mm | Average            | 72.8 | 183.8 | 238.9 | 333.9 | 415.4 | 557.6 |
|                                               | Standard Deviation | 1.80 | 4.95  | 5.27  | 8.30  | 6.25  | 11.38 |
|                                               | CV (%)             | 2.47 | 2.70  | 2.21  | 2.49  | 1.50  | 2.04  |
|                                               | YSI                | 74   | 185   | 233   | 326   | 411   | 548   |

This Table 4 in the submitted paper was obtained from the following Tables L1 and L2.

Table L1 Control solution test results for reference electrode length of 6.5mm and working electrode length of 7.15mm, W=0.206mm. (Unit: mg/dL)

| Lot No. | No. | Control solution test results |     |     |     |     |     |
|---------|-----|-------------------------------|-----|-----|-----|-----|-----|
| 1       | 1   | 76                            | 191 | 234 | 325 | 435 | 569 |
| 1       | 2   | 78                            | 200 | 240 | 346 | 424 | 582 |
| 1       | 3   | 77                            | 193 | 240 | 341 | 420 | 583 |
| 1       | 4   | 79                            | 185 | 244 | 332 | 433 | 584 |
| 1       | 5   | 76                            | 186 | 248 | 343 | 419 | 563 |
| 1       | 6   | 78                            | 193 | 233 | 333 | 416 | 553 |
| 1       | 7   | 77                            | 182 | 247 | 322 | 415 | 579 |
| 1       | 8   | 76                            | 195 | 246 | 325 | 420 | 589 |
| 1       | 9   | 75                            | 191 | 248 | 332 | 419 | 581 |
| 1       | 10  | 73                            | 199 | 247 | 337 | 421 | 583 |
| 1       | 11  | 73                            | 197 | 243 | 321 | 421 | 588 |
| 1       | 12  | 73                            | 189 | 233 | 338 | 427 | 570 |
| 1       | 13  | 73                            | 197 | 234 | 339 | 423 | 567 |
| 1       | 14  | 79                            | 183 | 237 | 350 | 419 | 561 |
| 1       | 15  | 78                            | 186 | 249 | 341 | 425 | 567 |
| 1       | 16  | 73                            | 186 | 244 | 330 | 421 | 575 |

|   |    |    |     |     |     |     |     |
|---|----|----|-----|-----|-----|-----|-----|
| 1 | 17 | 78 | 185 | 235 | 322 | 420 | 574 |
| 1 | 18 | 73 | 184 | 241 | 322 | 419 | 562 |
| 1 | 19 | 77 | 190 | 241 | 342 | 432 | 590 |
| 1 | 20 | 77 | 198 | 243 | 349 | 427 | 586 |
| 1 | 21 | 73 | 183 | 238 | 329 | 427 | 566 |
| 1 | 22 | 73 | 190 | 234 | 331 | 431 | 587 |
| 1 | 23 | 75 | 184 | 234 | 351 | 425 | 590 |
| 1 | 24 | 77 | 199 | 244 | 348 | 416 | 558 |
| 1 | 25 | 76 | 182 | 239 | 324 | 424 | 587 |
| 2 | 1  | 73 | 201 | 237 | 335 | 433 | 580 |
| 2 | 2  | 78 | 198 | 238 | 324 | 423 | 576 |
| 2 | 3  | 78 | 188 | 247 | 331 | 418 | 576 |
| 2 | 4  | 76 | 183 | 238 | 321 | 416 | 567 |
| 2 | 5  | 76 | 195 | 234 | 348 | 416 | 588 |
| 2 | 6  | 77 | 186 | 241 | 323 | 434 | 582 |
| 2 | 7  | 77 | 200 | 249 | 345 | 427 | 555 |
| 2 | 8  | 78 | 196 | 240 | 350 | 414 | 579 |
| 2 | 9  | 75 | 198 | 249 | 331 | 434 | 580 |
| 2 | 10 | 79 | 195 | 242 | 351 | 433 | 563 |
| 2 | 11 | 75 | 183 | 238 | 351 | 430 | 561 |
| 2 | 12 | 77 | 183 | 237 | 324 | 426 | 553 |
| 2 | 13 | 76 | 197 | 242 | 339 | 419 | 554 |
| 2 | 14 | 73 | 187 | 247 | 328 | 425 | 578 |
| 2 | 15 | 78 | 194 | 238 | 349 | 415 | 582 |
| 2 | 16 | 73 | 186 | 240 | 334 | 415 | 565 |
| 2 | 17 | 79 | 190 | 233 | 341 | 424 | 578 |
| 2 | 18 | 73 | 189 | 237 | 330 | 415 | 571 |
| 2 | 19 | 78 | 188 | 242 | 339 | 431 | 569 |
| 2 | 20 | 76 | 197 | 242 | 325 | 419 | 574 |
| 2 | 21 | 73 | 189 | 246 | 330 | 432 | 568 |
| 2 | 22 | 78 | 199 | 244 | 335 | 433 | 590 |
| 2 | 23 | 73 | 196 | 236 | 353 | 426 | 569 |
| 2 | 24 | 75 | 186 | 236 | 348 | 430 | 570 |
| 2 | 25 | 76 | 182 | 237 | 349 | 414 | 579 |
| 3 | 1  | 73 | 186 | 238 | 322 | 433 | 566 |
| 3 | 2  | 76 | 200 | 247 | 331 | 420 | 562 |
| 3 | 3  | 79 | 191 | 248 | 348 | 430 | 558 |

|   |                    |      |       |       |       |       |       |
|---|--------------------|------|-------|-------|-------|-------|-------|
| 3 | 4                  | 79   | 194   | 247   | 336   | 414   | 587   |
| 3 | 5                  | 77   | 199   | 246   | 321   | 427   | 570   |
| 3 | 6                  | 73   | 193   | 233   | 329   | 414   | 583   |
| 3 | 7                  | 73   | 191   | 234   | 341   | 432   | 587   |
| 3 | 8                  | 79   | 190   | 241   | 325   | 415   | 563   |
| 3 | 9                  | 75   | 200   | 239   | 346   | 417   | 557   |
| 3 | 10                 | 79   | 181   | 243   | 322   | 431   | 565   |
| 3 | 11                 | 73   | 193   | 235   | 341   | 420   | 578   |
| 3 | 12                 | 77   | 198   | 236   | 346   | 423   | 590   |
| 3 | 13                 | 77   | 199   | 240   | 351   | 434   | 562   |
| 3 | 14                 | 78   | 184   | 245   | 352   | 431   | 553   |
| 3 | 15                 | 73   | 195   | 234   | 325   | 417   | 572   |
| 3 | 16                 | 79   | 185   | 233   | 321   | 435   | 554   |
| 3 | 17                 | 77   | 199   | 241   | 334   | 415   | 574   |
| 3 | 18                 | 78   | 190   | 235   | 346   | 414   | 559   |
| 3 | 19                 | 75   | 187   | 249   | 334   | 427   | 586   |
| 3 | 20                 | 77   | 190   | 246   | 335   | 417   | 551   |
| 3 | 21                 | 78   | 196   | 234   | 350   | 433   | 575   |
| 3 | 22                 | 78   | 193   | 237   | 321   | 424   | 563   |
| 3 | 23                 | 76   | 188   | 233   | 346   | 425   | 578   |
| 3 | 24                 | 75   | 194   | 244   | 327   | 421   | 584   |
| 3 | 25                 | 78   | 188   | 233   | 338   | 433   | 585   |
|   | Average            | 76.1 | 191.2 | 240.2 | 335.9 | 423.8 | 572.8 |
|   | Standard Deviation | 2.12 | 5.82  | 5.12  | 10.24 | 6.74  | 11.29 |
|   | CV (%)             | 2.79 | 3.05  | 2.13  | 3.05  | 1.59  | 1.97  |
|   | YSI                | 74   | 185   | 233   | 326   | 411   | 548   |

Table L2 Control solution test results for reference electrode length of 24mm and working electrode length of 24.65mm. W=0.206mm.

(Unit: mg/dL)

| Lot No. | No. | Control solution test results |     |     |     |     |     |
|---------|-----|-------------------------------|-----|-----|-----|-----|-----|
| 1       | 1   | 72                            | 181 | 246 | 333 | 417 | 551 |
| 1       | 2   | 73                            | 176 | 240 | 334 | 411 | 547 |
| 1       | 3   | 74                            | 182 | 230 | 320 | 411 | 565 |
| 1       | 4   | 70                            | 184 | 237 | 337 | 415 | 575 |
| 1       | 5   | 72                            | 192 | 243 | 333 | 409 | 553 |

|   |    |    |     |     |     |     |     |
|---|----|----|-----|-----|-----|-----|-----|
| 1 | 6  | 73 | 192 | 241 | 336 | 414 | 553 |
| 1 | 7  | 71 | 190 | 235 | 334 | 422 | 563 |
| 1 | 8  | 70 | 185 | 245 | 331 | 413 | 543 |
| 1 | 9  | 72 | 182 | 230 | 339 | 416 | 576 |
| 1 | 10 | 74 | 180 | 236 | 344 | 423 | 546 |
| 1 | 11 | 74 | 190 | 237 | 341 | 411 | 555 |
| 1 | 12 | 75 | 182 | 237 | 320 | 404 | 549 |
| 1 | 13 | 74 | 188 | 244 | 340 | 417 | 539 |
| 1 | 14 | 72 | 186 | 241 | 335 | 406 | 548 |
| 1 | 15 | 73 | 176 | 247 | 342 | 414 | 566 |
| 1 | 16 | 71 | 178 | 246 | 342 | 422 | 550 |
| 1 | 17 | 73 | 186 | 232 | 339 | 418 | 559 |
| 1 | 18 | 74 | 183 | 236 | 344 | 420 | 556 |
| 1 | 19 | 75 | 184 | 234 | 330 | 424 | 566 |
| 1 | 20 | 73 | 179 | 233 | 320 | 422 | 558 |
| 1 | 21 | 75 | 183 | 239 | 339 | 405 | 557 |
| 1 | 22 | 75 | 177 | 234 | 340 | 421 | 551 |
| 1 | 23 | 73 | 176 | 246 | 344 | 418 | 572 |
| 1 | 24 | 75 | 187 | 247 | 322 | 413 | 539 |
| 1 | 25 | 70 | 180 | 243 | 334 | 404 | 551 |
| 2 | 1  | 75 | 177 | 244 | 327 | 424 | 558 |
| 2 | 2  | 71 | 183 | 247 | 330 | 409 | 576 |
| 2 | 3  | 71 | 178 | 241 | 346 | 412 | 544 |
| 2 | 4  | 75 | 190 | 245 | 317 | 407 | 577 |
| 2 | 5  | 72 | 183 | 240 | 341 | 415 | 562 |
| 2 | 6  | 73 | 187 | 246 | 324 | 408 | 546 |
| 2 | 7  | 71 | 189 | 232 | 327 | 421 | 571 |
| 2 | 8  | 73 | 184 | 247 | 333 | 420 | 573 |
| 2 | 9  | 75 | 190 | 247 | 329 | 411 | 571 |
| 2 | 10 | 75 | 179 | 239 | 322 | 424 | 539 |
| 2 | 11 | 70 | 188 | 247 | 329 | 422 | 558 |
| 2 | 12 | 74 | 177 | 231 | 325 | 424 | 556 |
| 2 | 13 | 74 | 184 | 237 | 344 | 424 | 539 |
| 2 | 14 | 75 | 188 | 238 | 335 | 424 | 545 |
| 2 | 15 | 72 | 192 | 245 | 340 | 413 | 553 |
| 2 | 16 | 75 | 181 | 235 | 338 | 404 | 571 |
| 2 | 17 | 71 | 191 | 237 | 320 | 409 | 570 |

|   |                    |      |       |       |       |       |       |
|---|--------------------|------|-------|-------|-------|-------|-------|
| 2 | 18                 | 73   | 180   | 236   | 334   | 408   | 548   |
| 2 | 19                 | 73   | 191   | 240   | 317   | 418   | 560   |
| 2 | 20                 | 70   | 189   | 233   | 333   | 415   | 574   |
| 2 | 21                 | 75   | 188   | 231   | 335   | 423   | 569   |
| 2 | 22                 | 72   | 179   | 242   | 331   | 419   | 576   |
| 2 | 23                 | 74   | 176   | 244   | 347   | 420   | 565   |
| 2 | 24                 | 75   | 178   | 238   | 341   | 414   | 542   |
| 2 | 25                 | 71   | 183   | 240   | 332   | 419   | 548   |
| 3 | 1                  | 75   | 186   | 237   | 328   | 411   | 559   |
| 3 | 2                  | 75   | 185   | 232   | 336   | 411   | 570   |
| 3 | 3                  | 72   | 185   | 236   | 330   | 415   | 540   |
| 3 | 4                  | 75   | 181   | 231   | 342   | 422   | 557   |
| 3 | 5                  | 72   | 189   | 243   | 334   | 420   | 542   |
| 3 | 6                  | 71   | 178   | 235   | 344   | 418   | 543   |
| 3 | 7                  | 70   | 183   | 239   | 329   | 412   | 560   |
| 3 | 8                  | 70   | 190   | 240   | 347   | 406   | 573   |
| 3 | 9                  | 74   | 185   | 233   | 345   | 409   | 563   |
| 3 | 10                 | 74   | 192   | 233   | 343   | 404   | 550   |
| 3 | 11                 | 72   | 179   | 243   | 342   | 410   | 546   |
| 3 | 12                 | 74   | 184   | 233   | 333   | 419   | 576   |
| 3 | 13                 | 71   | 184   | 240   | 332   | 408   | 543   |
| 3 | 14                 | 70   | 188   | 247   | 338   | 417   | 560   |
| 3 | 15                 | 75   | 192   | 238   | 317   | 411   | 553   |
| 3 | 16                 | 71   | 175   | 245   | 321   | 424   | 565   |
| 3 | 17                 | 71   | 180   | 235   | 317   | 420   | 569   |
| 3 | 18                 | 70   | 178   | 232   | 340   | 422   | 560   |
| 3 | 19                 | 75   | 184   | 244   | 338   | 405   | 562   |
| 3 | 20                 | 70   | 191   | 234   | 344   | 424   | 550   |
| 3 | 21                 | 73   | 188   | 233   | 341   | 411   | 551   |
| 3 | 22                 | 74   | 180   | 246   | 324   | 424   | 544   |
| 3 | 23                 | 75   | 177   | 233   | 326   | 422   | 567   |
| 3 | 24                 | 72   | 179   | 236   | 339   | 420   | 573   |
| 3 | 25                 | 70   | 186   | 235   | 339   | 415   | 566   |
|   | Average            | 72.8 | 183.8 | 238.9 | 333.9 | 415.4 | 557.6 |
|   | Standard Deviation | 1.80 | 4.95  | 5.27  | 8.30  | 6.25  | 11.38 |
|   | CV (%)             | 2.47 | 2.70  | 2.21  | 2.49  | 1.50  | 2.04  |
|   | YSI                | 74   | 185   | 233   | 326   | 411   | 548   |

(9)The Nine Reference Data

Table 5 Control solution test results for different electrode width but same electrode length. (Unit: mg/dL).

|                                                 |                    |      |       |       |       |       |       |
|-------------------------------------------------|--------------------|------|-------|-------|-------|-------|-------|
| Length= 24 &<br>24.65mm;<br>Width=<br>0.62mm    | Average            | 73.2 | 185.6 | 233.7 | 329.6 | 409.7 | 544.4 |
|                                                 | Standard Deviation | 3.34 | 5.55  | 7.30  | 11.47 | 7.65  | 12.10 |
|                                                 | CV (%)             | 4.57 | 2.99  | 3.12  | 3.48  | 1.87  | 2.22  |
|                                                 | YSI                | 74   | 185   | 233   | 326   | 411   | 548   |
| Length= 10.5<br>& 11.05mm;<br>Width=<br>0.206mm | Average            | 73.7 | 182.5 | 230.4 | 327.7 | 412.7 | 547.6 |
|                                                 | Standard Deviation | 3.73 | 4.61  | 7.18  | 11.12 | 10.28 | 12.24 |
|                                                 | CV (%)             | 5.05 | 2.53  | 3.11  | 3.39  | 2.49  | 2.24  |
|                                                 | YSI                | 74   | 185   | 233   | 326   | 411   | 548   |

This Table 5 in the submitted paper was obtained from the following Tables M1 and M2.

Table M1 Control solution test results for reference electrode length of 24mm and working electrode length of 24.65mm. W=0.62mm. (Unit: mg/dL)

| No. | Control solution test results |     |     |     |     |     |
|-----|-------------------------------|-----|-----|-----|-----|-----|
| 1   | 69                            | 181 | 237 | 340 | 411 | 552 |
| 2   | 71                            | 195 | 241 | 321 | 413 | 548 |
| 3   | 73                            | 184 | 242 | 333 | 412 | 541 |
| 4   | 79                            | 187 | 240 | 343 | 404 | 559 |
| 5   | 72                            | 181 | 226 | 344 | 407 | 547 |
| 6   | 69                            | 184 | 226 | 331 | 423 | 541 |
| 7   | 69                            | 188 | 224 | 332 | 403 | 540 |
| 8   | 76                            | 185 | 222 | 343 | 406 | 532 |
| 9   | 71                            | 178 | 234 | 339 | 400 | 528 |
| 10  | 77                            | 178 | 228 | 336 | 399 | 539 |
| 11  | 71                            | 193 | 241 | 323 | 422 | 561 |
| 12  | 76                            | 181 | 240 | 339 | 398 | 540 |
| 13  | 79                            | 191 | 233 | 310 | 397 | 559 |
| 14  | 76                            | 187 | 237 | 317 | 413 | 542 |
| 15  | 76                            | 189 | 222 | 337 | 413 | 529 |
| 16  | 71                            | 178 | 242 | 329 | 410 | 559 |
| 17  | 70                            | 193 | 228 | 340 | 416 | 531 |
| 18  | 79                            | 186 | 223 | 332 | 414 | 533 |

|                    |      |        |        |        |        |       |
|--------------------|------|--------|--------|--------|--------|-------|
| 19                 | 76   | 184    | 235    | 331    | 422    | 562   |
| 20                 | 69   | 176    | 241    | 310    | 417    | 529   |
| 21                 | 72   | 183    | 236    | 320    | 412    | 566   |
| 22                 | 71   | 187    | 245    | 345    | 402    | 556   |
| 23                 | 74   | 195    | 226    | 317    | 414    | 527   |
| 24                 | 71   | 193    | 238    | 310    | 401    | 543   |
| 25                 | 73   | 184    | 235    | 317    | 413    | 546   |
| Average            | 73.2 | 185.64 | 233.68 | 329.56 | 409.68 | 544.4 |
| Standard Deviation | 3.34 | 5.55   | 7.30   | 11.47  | 7.65   | 12.10 |
| CV (%)             | 4.57 | 2.99   | 3.12   | 3.48   | 1.87   | 2.22  |
| YSI                | 74   | 185    | 233    | 326    | 411    | 548   |

Table M2 Control solution test results for reference electrode length of 10.4mm and working electrode length of 11.05mm. W=0.206mm. (Unit: mg/dL)

| No. | Control solution test results |     |     |     |     |     |
|-----|-------------------------------|-----|-----|-----|-----|-----|
| 1   | 72                            | 175 | 220 | 343 | 424 | 556 |
| 2   | 69                            | 181 | 239 | 336 | 402 | 539 |
| 3   | 72                            | 180 | 243 | 341 | 416 | 539 |
| 4   | 77                            | 183 | 223 | 312 | 409 | 532 |
| 5   | 78                            | 179 | 220 | 314 | 424 | 541 |
| 6   | 79                            | 186 | 236 | 340 | 400 | 560 |
| 7   | 76                            | 188 | 222 | 312 | 424 | 564 |
| 8   | 69                            | 186 | 237 | 324 | 414 | 543 |
| 9   | 70                            | 177 | 232 | 326 | 408 | 560 |
| 10  | 77                            | 183 | 220 | 323 | 415 | 525 |
| 11  | 77                            | 185 | 236 | 336 | 398 | 547 |
| 12  | 69                            | 179 | 223 | 317 | 398 | 526 |
| 13  | 69                            | 187 | 238 | 326 | 408 | 555 |
| 14  | 71                            | 182 | 225 | 315 | 425 | 561 |
| 15  | 71                            | 179 | 227 | 330 | 409 | 552 |
| 16  | 74                            | 187 | 223 | 327 | 399 | 534 |
| 17  | 72                            | 177 | 229 | 312 | 423 | 537 |
| 18  | 79                            | 181 | 228 | 325 | 424 | 552 |
| 19  | 77                            | 175 | 234 | 345 | 409 | 563 |
| 20  | 79                            | 185 | 241 | 334 | 421 | 530 |
| 21  | 71                            | 185 | 227 | 316 | 421 | 546 |
| 22  | 76                            | 180 | 232 | 343 | 403 | 557 |

|                    |       |        |       |        |        |       |
|--------------------|-------|--------|-------|--------|--------|-------|
| 23                 | 69    | 191    | 231   | 332    | 396    | 558   |
| 24                 | 78    | 192    | 238   | 321    | 424    | 561   |
| 25                 | 72    | 180    | 236   | 343    | 424    | 552   |
| Average            | 73.72 | 182.52 | 230.4 | 327.72 | 412.72 | 547.6 |
| Standard Deviation | 3.73  | 4.61   | 7.18  | 11.12  | 10.28  | 12.24 |
| CV (%)             | 5.05  | 2.53   | 3.11  | 3.39   | 2.49   | 2.24  |
| YSI                | 74    | 185    | 233   | 326    | 411    | 548   |
